# Supplementary material for: A genetic association study of glutamine-encoding DNA sequence structures, somatic CAG expansion, and DNA repair gene variants, with Huntington disease clinical outcomes
Source: PubMed Central journal article supplement (PMC6838430; doi:10.1016/j.ebiom.2019.09.020), 2019-10-10
Supplement: mmc1.pdf [file mmc1.pdf]

# A genetic association study of glutamine-encoding DNA sequence structures, somatic CAG expansion, and DNA repair gene variants, with Huntington disease clinical outcomes

Marc Ciosi, Alastair Maxwell, Sarah A. Cumming, Davina J. Hensman Moss, Asma M. Alshammari, Michael D. Flower, Alexandra Durr, Blair R. Leavitt, Raymund A. Roos, the TRACK-HD team, the Enroll-HD team, Peter Holmans, Lesley Jones, Douglas R. Langbehn, Seung Kwak, Sarah J. Tabrizi and Darren G. Monckton

*EBioMedicine* 2019

## Supplementary material: table of contents

| Section                                                                                                                                                                                                                                        | Subsection                                                                                                                                                     | Pages                                                                                                     |
|------------------------------------------------------------------------------------------------------------------------------------------------------------------------------------------------------------------------------------------------|----------------------------------------------------------------------------------------------------------------------------------------------------------------|-----------------------------------------------------------------------------------------------------------|
| <b>I. Supplementary text</b>                                                                                                                                                                                                                   | I.1. Supplementary methods                                                                                                                                     | 2 to 6                                                                                                    |
| <b>II. Supplementary tables</b>                                                                                                                                                                                                                | Tables are listed in the order in which they are referred to in the main and then the supplementary text                                                       | 7 to 19                                                                                                   |
|                                                                                                                                                                                                                                                | Table S1: Literature review of atypical <i>HTT</i> structures and their association with Huntington disease (HD) clinical outcomes and genetic instability     | 7                                                                                                         |
|                                                                                                                                                                                                                                                | Table S2: Linear regression models of relationships between allele structures and somatic expansions in HD                                                     | 8 to 9                                                                                                    |
|                                                                                                                                                                                                                                                | Table S3: Cox regression models of relationships between allele length, sequence structure and somatic expansion scores with age at onset of HD motor symptoms | 10                                                                                                        |
|                                                                                                                                                                                                                                                | Table S4: Linear regression models of relationships between sequence structure and somatic expansions scores with disease progression in HD                    | 11                                                                                                        |
|                                                                                                                                                                                                                                                | Table S5: Linear regression models of relationships between sequence structure and somatic expansions scores with the rate of change of TMS and TFC in HD      | 12                                                                                                        |
|                                                                                                                                                                                                                                                | Table S6: Linear regression models of the relationship between sequence structure and somatic expansions scores with TMS in HD                                 | 13 to 14                                                                                                  |
|                                                                                                                                                                                                                                                | Table S7: Genetic associations between candidate SNPs and the somatic expansion scores of the <i>HTT</i> CAG repeat                                            | 15                                                                                                        |
|                                                                                                                                                                                                                                                | Table S8: Human tissue-specific expression quantitative trait data for DNA repair gene SNPs                                                                    | 16 to 19                                                                                                  |
|                                                                                                                                                                                                                                                | <b>III. Supplementary figures</b>                                                                                                                              | Figures are listed in the order in which they are referred to in the main and then the supplementary text |
| Figure S1: Comparison of CAG repeat lengths determined by deep-sequencing ( $Q^1$ ) and estimated by fragment-length analyses ( $Q^{FL}$ )                                                                                                     |                                                                                                                                                                | 20                                                                                                        |
| Figures S2/3: Read depth distributions for CAG repeat length support a somatic origin for repeat length gains                                                                                                                                  |                                                                                                                                                                | 21 to 22                                                                                                  |
| Figure S4: Relative toxicities for alleles dependent either on total glutamine or pure CAG length                                                                                                                                              |                                                                                                                                                                | 23                                                                                                        |
| Figure S5: Association of pure CAG repeat length ( $Q^1$ ), fragment length estimated CAG ( $Q^{FL}$ ) and total encoded-glutamine length ( $Q^1$ ) with the number of additional glutamine codons ( $Q^2$ ) on disease-associated chromosomes |                                                                                                                                                                | 24                                                                                                        |
| Figure S6: Blood and brain dynamics of CAG repeats dependent on CAG structures and SNP genotypes                                                                                                                                               |                                                                                                                                                                | 25                                                                                                        |
| <b>IV. References for supplementary material</b>                                                                                                                                                                                               | IV.1. References                                                                                                                                               | 26 to 27                                                                                                  |
| <b>V. Investigator lists</b>                                                                                                                                                                                                                   | V.1. TRACK-HD investigator list                                                                                                                                | 28 to 29                                                                                                  |
|                                                                                                                                                                                                                                                | V.2. Enroll-HD investigator list                                                                                                                               | 29 to 35                                                                                                  |

## I. Supplementary text

### I.1. Supplementary Methods

#### I.1.1. HD cohorts

##### I.1.1.1. TRACK-HD

Track-HD was a prospective, observational study that collected deep clinical data, including imaging, quantitative motor and cognitive assessments, from adults with early HD, premanifest HD and controls. Comprehensive details of entry inclusion and exclusion criteria and group definitions are available in the online supplement to Tabrizi *et al.*<sup>1</sup> Briefly, multivariate clinical, neuropsychological, psychiatric, and brain-imaging data were collected annually at four visits spanning approximately 36 months of follow-up from 2008 to 2011. Baseline data were collected on 120 premanifest HD, 123 early HD, and 123 control participants, recruited evenly from study sites in London (UK), Paris (France), Leiden (Netherlands), and Vancouver (BC, Canada).<sup>1</sup> Manifest HD subjects were required to demonstrate motor abnormalities that were unequivocal signs of HD, as evidenced by total motor scores (TMS) over five, and diagnostic confidence level of four on the Unified Huntington's Disease Rating Scale (UHDRS).<sup>2</sup> Furthermore, their functional level measured by the UHDRS total functional capacity scale (TFC) was seven or higher. Thus, these subjects were in the early clinical stages of manifest HD. Premanifest HD mutation carriers were required to have a burden of pathology score ( $\text{age} \times [\text{CAG} - 36.5]$ )<sup>3</sup> greater than 250. This criterion was adopted to ensure that potential participants with very little probability of showing any progression toward diagnosed HD were excluded. Further, the pre-HD participants were required to have a screening baseline UHDRS TMS of five or lower diagnostic confidence level less than four, which is widely used as the threshold for considering a person "diagnosed" with clinically significant HD. Potential subjects were excluded if they were less than 18 years of age, if their burden of pathology score was less than 250, if they were unable to give informed consent, if they were unable to tolerate MRI scanning or bio-sample collection, if they had a history of major psychiatric illness (*e.g.* schizophrenia) or history of significant head trauma, or if they were currently participating in a clinical trial for any experimental HD treatment.

The present study initially considered 218 adult participants from TRACK-HD with premanifest or early clinical HD who had at least one follow-up visit that included successful brain MRI measurement (disease progression, the target outcome, could not be scored on 25 other participants).<sup>4</sup> Fifteen TRACK-HD participants were excluded: one from a twin pair; one whom, in addition to a non-disease associated allele, presented with a bimodal read count distribution with pure CAG (Q<sup>1</sup>) modes at 43 and 45 CAG repeats; three participants with a pure CAG tract (Q<sup>1</sup>) modal allele > 50 CAG in who, because of the combination of PCR slippage and high levels of somatic expansion, the inherited progenitor allele could not be unambiguously identified; four participants with a pure CAG < 40; and six non-Caucasians. The data presented here thus correspond to 203 out of the 218 TRACK-HD participants, comprising 105 premanifest, and 98 manifest, for motor symptoms. TRACK-HD DNA repair gene SNP genotypes were taken from Hensman Moss *et al.*<sup>4</sup> TRACK-HD fragment length analysis genotypes (Q<sup>FL</sup>) were generated by BioRep (<http://www.biorep.it/en>) using standard procedures.<sup>5-7</sup>

##### I.1.1.2. Enroll-HD

Enroll-HD is a global clinical research platform designed to facilitate clinical research in Huntington disease.<sup>8</sup> Full details of the HD eligibility and exclusion criteria and clinical assessments are available from <https://www.enroll-hd.org/for-researchers/technical-support/>. Briefly, Enroll-HD aims to recruit subjects 18 years or older who are HD gene expansion mutation carriers (CAG > 35) independent of the clinical manifestation or the stage of HD, and controls who do not carry the HD expansion mutation and who comprise the comparator study population. For individuals under the age of 18 years, those with clinically diagnosed features of HD in the setting of a confirmatory family history or a positive genetic test result were also eligible. Individuals who do not meet the criteria above or with choreic movement disorders with a negative test for HD expansion mutation are excluded. Enroll-HD study sites recruit participants through clinical visits, family referral, outreach through the many lay associations, and genetic counselling centres. Core data sets are collected annually on all research participants as part of this multi-centre longitudinal observational study of HD. Data are monitored for quality and accuracy using a risk-based monitoring approach. Enroll-HD remains open to recruitment and, as of 2<sup>nd</sup> January 2019, had 17,886 active participants recruited via 172 centres in 19 countries.

With the aim of replicating the findings of the initial analysis on TRACK-HD data, we collected data from a replication cohort of 615 participants from Enroll-HD carrying a disease-associated allele (Q<sup>1</sup> > 35). To perform the replication study with similar characteristics to the initial TRACK-HD analysis, 72 Enroll-HD participants were excluded: eight participants with a pure CAG tract (Q<sup>1</sup>) modal allele > 50 CAG; 26 participants with a pure CAG < 40; four non-Caucasians; and 34 for whom clinical data was not available and ethnicity was unknown. Thus, the final cohort of Enroll-HD participants used for the description of allelic variation at the *HTT* exon one repeat locus comprised 543 individuals. Of these, 12 participants generated < 250 DNA sequencing reads for the progenitor expanded *HTT* allele and thus a somatic expansion score could not be determined. Thus, the final cohort of Enroll-HD participants used for

the genotype to phenotype analyses comprised 531 individuals, of which 141 were premanifest, and 390 manifest, for motor symptoms.

This study complies with all relevant ethical regulations. All participants were recruited with informed consent and all collaborating clinical sites are required to obtain and maintain local ethics committee approvals. The study was approved by TRACK-HD and Enroll-HD.

TRACK-HD and Enroll-HD are sponsored by CHDI Foundation, Inc., a nonprofit biomedical research organization exclusively dedicated to developing therapeutics for Huntington disease. Data used in this work was generously provided by the participants in the TRACK-HD and Enroll-HD study and made available by CHDI Foundation, Inc.

## **I.1.2. HD outcomes**

**I.1.2.1. Age at motor onset (AAO).** For Track-HD, AAO was recorded as the onset of motor symptoms in HD, as determined by the Track-HD investigating neurologist based on clinical history, review of case notes and examination. For Enroll-HD, AAO was recorded as onset of motoric symptom estimated by an independent rater based on clinical history, case notes and examination. Age at motor onset was available for 105 Track-HD and 395 Enroll-HD participants.

**I.1.2.2. Total motor score (TMS).** TMS is a standard scale in the Unified Huntington Disease Rating Scale (UHDRS).<sup>2</sup> The motor section of the UHDRS assesses motor features of HD using standardized ratings of oculomotor function, dysarthria, motor impersistence, chorea, dystonia, bradykinesia, gait, and postural stability. The total motor impairment score is the sum of the individual motor ratings (range 0 to 124); higher scores indicate more severe motor impairment. Motor impairment is considered to be present once a TMS score of 10 is achieved. TMS at baseline was available for all 203 TRACK-HD participants and 531 Enroll-HD participants. Longitudinal TMS data over three years were also available for all 203 TRACK-HD participants. For linear regression analyses where baseline TMS was the dependent variable, square-root transformation of baseline TMS was used for normalisation and to minimise the influence of extreme values (W statistics of the Shapiro-Wilk test before and after transformation were 0.89 and 0.97).

**I.1.2.3. Total functional capacity (TFC).** The UHDRS TFC scale assesses a person with HD in terms of ability to work, complete household finances, chores and activities of daily living, and what level of care they need.<sup>2</sup> The scale ranges from 0 (fully dependent for all care) to 13 (fully independent). Longitudinal TFC data over three years were available for all 203 TRACK-HD participants.

**I.1.2.4. HD progression score.** HD progression scores were calculated for the 203 TRACK-HD participants as previously described (see particularly Figure 1B).<sup>4</sup> This score was determined as follows:

1) We estimated the longitudinal influence of CAG length, using either the fragment-length estimate ( $Q^{FL}$ ) or the pure CAG ( $Q^1$ ), upon each of a wide range of motor, neuropsychological, and brain imaging outcomes. The following measurements were used as outcome variables: symbol digit; Stroop word; paced tapping 3 Hz (inverse SD); spot the change 5K; emotion recognition; direct circle (log annulus length); indirect circle (log annulus length); total brain volume; ventricular volume; grey matter volume; white matter volume; caudate volume; metronome tapping, nondominant hand (log of tap initiation SD for all trials); metronome tapping, nondominant hand (inv tap initiation SD for self-paced trials); speeded tapping, nondominant hand (log of repetition time SD); speeded tapping, nondominant hand (log of tap duration SD); speeded tapping, nondominant hand (mean inter-tap time); tongue force—heavy (log coefficient of variation); tongue force—light (log coefficient of variation); grip force, dominant hand, heavy condition (log of mean orientation); grip force, dominant hand, heavy condition (log of mean position); grip force, nondominant hand, heavy condition (log of coefficient of variation); grip force, dominant hand, light condition (log of coefficient of variation); and grip force, nondominant hand, light condition (log of coefficient of variation). We used a mixed effect linear model for the visit-dependent values of each outcome. Random subject effects in these mixed linear models were accounted for using correlated random intercepts and slopes. The models used age, fragment-length estimated CAG and the age-by-CAG interaction as predictors. Further nonlinearity in relationships between CAG length and the outcomes was modelled by also using as a predictor the cumulative probability of onset statistic, which is defined as 1 minus the estimated survival probability as calculated using the fragment-length CAG-dependent age of onset formula of Langbehn *et al.*<sup>9</sup> Note that the use of these fragment-length CAG estimates precludes derivation of a progression score using the total glutamine length encoded that would be two repeats longer. These models also controlled for study site, sex, and education level. We accounted for the longitudinal influence of all predictor variables using their interactions with length of follow-up from the baseline visit.

2) For each separate outcome, atypical progression unaccounted for by the model in step 1 was estimated using the empirical Bayes estimated random slope for each participant.

3) We performed a principal component analysis on the estimated slopes from step 2 and found that the first component was substantially correlated ( $r > 0.40$ ) with the majority of the 24 outcomes listed above. Exceptions were: paced tapping 3 Hz (inverse SD); spot the change 5K; emotion recognition; direct circle (log annulus length); metronome tapping, nondominant hand (inv tap initiation SD for self-paced trials); speeded tapping, nondominant hand (log of repetition time SD); speeded tapping, nondominant hand (log of repetition time SD); speeded tapping, nondominant hand (log of tap duration SD); speeded tapping, nondominant hand (mean inter-tap time); tongue force—heavy (log coefficient of variation); and tongue force—light (log coefficient of variation).

4) The first principal component score from step 3 was defined as the atypical progression score.

In the main text, we refer to this measure of atypical progression as the ‘progression score’. One unit increase in progression score in TRACK-HD corresponded to an increase of 0.71 units year<sup>-1</sup> (95% CI 0.34 to 1.08) in the rate of change of TMS, and an increase of approximately 0.2 units year<sup>-1</sup> (95% CI 0.12 to 0.30) in the rate of change of TFC.<sup>4</sup>

### 1.1.3. *HTT* exon one repeat region sequencing and genotyping

The *HTT* exon one repeat region was amplified from 20 ng of blood DNA (whole blood from TRACK-HD and buffy coat from Enroll-HD) using MiSeq-compatible PCR primers.<sup>10</sup> TruSeq CD indexes allowing the sequencing of up to 96 samples per MiSeq run were used for the TRACK-HD samples (see table 1 in Ciosi *et al.*).<sup>10</sup> Nextera XT Index Kit v2 indexes allowing the sequencing of up to 384 samples per MiSeq run were used for the Enroll-HD samples (see table 2 in Ciosi *et al.*).<sup>10</sup> See Ciosi *et al.*,<sup>10</sup> for the full details of the sequencing library preparation and MiSeq sequencing. MiSeq library preparation for the TRACK-HD cohort was undertaken at the University of Glasgow and sequencing was performed by Glasgow Polyomics (<http://www.polyomics.gla.ac.uk>). MiSeq library preparation and sequencing for the Enroll-HD cohort was performed at Q<sup>2</sup> Solutions – EA Genomics (<https://www.q2labsolutions.com/genomics-laboratories>) using the same methods. A separate batch of replicate samples was sequenced at both centres with 100% concordance for the sequence and modal length of alleles  $Q^1 \leq 52$ .

### 1.1.4. Genotyping of the *HTT* exon one repeat region

The *HTT* exon one repeat region was genotyped from the MiSeq reads generated using ScaleHD (version 0.251)(AM, MC and DGM., manuscript in preparation). ScaleHD is a bioinformatics pipeline for the automated genotyping of high-throughput next-generation sequencing reads of the *HTT* exon one repeat region. ScaleHD is a collection of open-source software, combined with internally-developed modules to genotype individuals from *HTT* amplicon sequencing data. Prior to processing them through ScaleHD, reads were demultiplexed using cutadapt (version 1.9.1) using the options -g, -e 0, --overlap 10 and --discard-untrimmed.<sup>11</sup> Forward (*i.e.* Read 1) and reverse (*i.e.* Read 2) reads were respectively demultiplexed based on the first 5’-bases of the HD319F and 33935.5 locus-specific PCR primers.<sup>10</sup> This initial 5’-demultiplexing/trimming step removes reads that do not start with a PCR primer binding site and trims all the reads at the same position within the PCR primer binding site. This allows processing of reads, through ScaleHD, which start at the same position and allows for trimming of the spacer which is present 5’ of the locus-specific primer in the sequencing reads.<sup>10</sup> Reads were then processed through ScaleHD. The ScaleHD configuration and parameter values used can be found below (supplementary text I.1.5).

The ScaleHD pipeline was used to remove the Illumina sequencing adapter at the 3’-end of the reads. Resultant trimmed forward reads for each sample were then aligned by ScaleHD using BWA-MEM against a library of 4,000 *HTT* reference sequences, each with a typical allele structure  $Q^1-1-1-P^2-2$  (table 1), but each with a unique  $Q^1/P^2$  combination with  $1 \leq Q^1 \leq 200$  and  $1 \leq P^2 \leq 20$ . Each of these 4,000 reference sequences also extends to the binding sites of the HD319F and 33935.5 locus-specific PCR primers, respectively 5’ and 3’ of the *HTT* exon one repeat region. In the same way, reverse reads for a sample were then aligned to a library of 20 references in which  $Q^1 = 100$  and  $1 \leq P^2 \leq 20$ . The reverse read alignments are less complex than the forward, which allowed the genotyping of the *HTT* CCG repeat independently from the CAG repeat. ScaleHD then scanned the forward and reverse alignment maps with digital signal processing to determine the literal structure of the *HTT* exon one repeat region. If known atypical allele structures were detected (table 1),<sup>12</sup> re-alignment to custom dynamically-generated atypical reference libraries was performed for confirmation. ScaleHD informs the user if an unknown atypical allele structure is detected, *i.e.* a structure different from  $Q^1-Q^2-P^1-P^2-P^3$  or with  $Q^2 > 2$ ,  $P^2 > 1$  or  $P^3 > 3$ . ScaleHD then utilises data from digital signal processing to guide machine-learning driven genotyping modules towards the correct classification for the data (AM, MC and DGM, manuscript in preparation). The forward read count distribution, *i.e.* the distribution of the number of forward

reads aligned to each of the 4,000 references considered, for all the TRACK-HD samples was manually plotted and inspected to deduce the genotype of the *HTT* exon one repeat region to confirm ScaleHD genotyping. For all the TRACK-HD and Enroll-HD samples, the alignment of forward reads to the two reference sequences corresponding to one non-disease associated allele and one disease-associated allele were visually inspected in Tablet (version 1.17.08.17).<sup>13</sup> Visual inspection was performed for all alignments to a typical reference library and all the re-alignments to an atypical reference library.

#### 1.1.5. ScaleHD *HTT* genotyping configuration file

```
<config data_dir="/TRACK-HDandEnrollHD_MiSeqdata_DMPXedWithCutadapt191" forward_reference="4k-HD-INTER.fas" reverse_reference="RV_CAG-1-1-CCG-2.fasta">
  <instance_flags quality_control="True" sequence_alignment="True" atypical_realignment="True"
  genotype_prediction="True" snp_calling="False"/>
  <trim_flags trim_type="Adapter" quality_threshold="5" adapter_flag="-a"
  forward_adapter="GATCGGAAGAGCACACGTCTGAACTCCAGTCAC"
  reverse_adapter="AGATCGGAAGAGCGTCGTGTAGGGAAAGAGTGT" error_tolerance="0.39"/>
  <alignment_flags min_seed_length="19" band_width="100" seed_length_extension="1.5"
  skip_seed_with_occurrence="500" chain_drop="0.50" seeded_chain_drop="0" seq_match_score="1"
  mismatch_penalty="4" indel_penalty="6,6" gap_extend_penalty="4,4" prime_clipping_penalty="5,5"
  unpaired_pairing_penalty="17"/>
  <prediction_flags plot_graphs="True"/>
</config>
```

#### 1.1.6. Single-molecule sequencing experiment

HD patients carrying alleles of the typical structure Q<sup>1</sup>-1-1-7-2 and Q<sup>1</sup> between 40 and 50 were selected based on genotypes of the *HTT* exon one repeat obtained as described above. For blood DNA samples from these selected patients, DNA concentrations were determined using the Qubit HS kit (Thermo Fisher UK Ltd). An equimolar pool of genomic DNA was then prepared, and the pooled DNA was digested with 10 units HindIII (NEB UK Ltd, 37°C for 2 h followed by heat inactivation at 65°C for 20 min), then diluted to 5 pg μl<sup>-1</sup> for PCR. Each PCR plate included a 1 ng μl<sup>-1</sup> positive control, five no-template controls (NTC) and 90 separate reactions each containing 5 pg pooled genomic DNA template. The *HTT* exon one repeat region was amplified by PCR for 10 cycles using the HD319F and 33935.5 primers,<sup>10</sup> then each reaction was split into two aliquots of equal volume. More Taq polymerase, primers, DMSO and 'Custom PCR Master Mix+βME' were added to aliquot 1 to the appropriate concentrations,<sup>10</sup> and 19 further cycles of amplification were performed on aliquot 1 using the same primers. The aliquot 1 PCR products were resolved by electrophoresis, Southern blotted and hybridised with a CTG•CAG repeat probe essentially as described.<sup>14</sup> From the autoradiographs, aliquot 1 reactions that had a single band, or two widely spaced bands, amplified from disease-associated alleles were selected for further analysis. Aliquot 2 from each of the selected single molecule-containing reactions, as well as the NTCs, were digested with 10 U ExoI to destroy the primers (NEB UK Ltd, 37°C for 1 h, followed by heat inactivation at 80°C for 10 min). MiSeq-compatible PCR primers with TruSeq CD indexes and all other PCR reagents, as described previously, were then added to each aliquot 2 sample to restore the appropriate concentrations in the final reactions, and 19 further cycles of PCR were carried out as described by Ciosi *et al.*<sup>10</sup> Sequencing library preparation steps post-PCR were performed as described by Ciosi *et al.*,<sup>10</sup> except for the fact that the aliquot 2 sequencing was mixed with another sequencing library of higher DNA concentration because its concentration was too low to be sequenced on its own. *HTT* exon one repeat region reads were then genotyped using ScaleHD as described in the previous section.

#### 1.1.7. Quantification of the ratio of somatic expansions of disease-associated alleles

From the MiSeq read count distribution obtained for each disease-associated allele sequenced (*e.g.* figure S3B) we quantified the ratio of somatic expansions using the measure  $\frac{\sum_{i=1}^{10} n_{+i}}{n}$ , where  $n$  is the number of MiSeq reads corresponding to the progenitor allele (for example (CAG)<sub>44</sub> in figure S3) and  $n_{+i}$  is the number of MiSeq reads corresponding to the sequenced variants with  $i$  more CAG repeats than the progenitor allele. This measure of somatic expansions is thus the relative ratio of somatic variants that have gained one to ten CAG repeats over the number of repeats in the progenitor allele. Somatic variants with more CAG repeats than the progenitor allele were quantified in the interval  $[i = 1, i = 10]$  because this interval included 99.9% of the sequenced reads longer than the progenitor allele in our MiSeq data obtained from blood DNA. The relative ratio of somatic expansions of disease-associated alleles was quantified in TRACK-HD and Enroll-HD participants for which  $n \geq 250$  reads.  $n$  was  $< 250$  reads for only 12 Enroll-HD participants. For linear regression analyses, ln-transformation of the somatic expansion ratio was used for normalisation and to minimise the influence of extreme values (W statistics of the Shapiro-Wilk test before and after transformation were 0.78 and 0.97).

#### 1.1.8. Determination of the somatic expansion score of disease-associated alleles



Individual-specific somatic expansion scores were defined as the residual variation in the ratio of somatic expansions corrected for sex, cohort, and an interaction between age at sampling and length of the pure CAG repeat ( $Q^1$ ) (model SEQ1 in table S2, appendix).

### I.1.9. Selection of candidate SNPs and SNP genotyping in the Enroll-HD cohort

Single-nucleotide polymorphisms (SNP) were selected as previously defined by Bettencourt *et al.*,<sup>15</sup> as “the most significant genes (gene-wide,  $p < 0.1$ ) in the ‘DNA repair pathway cluster’ from the GeM-HD analysis” as well as SNPs in *RRM2B* and *UBR5*. We also selected SNPs that were associated with a genome-wide  $p < 10^{-6}$  in the GeM-HD analysis<sup>16</sup>, as well as an *MSH3* variant associated with HD progression<sup>4</sup>. In the discovery TRACK-HD cohort, out of 31 SNPs meeting the above criteria, genotypes for 28 SNPs were available<sup>4</sup> (tables 3 and S7, appendix). SNPs in the Enroll-HD replication cohort were genotyped using a KASP assay (LGC Genomics). The top *MSH3* SNP of the genome-wide association study of HD progression (rs557874766)<sup>4</sup> is located in a 9 bp tandem repeat which is not suitable for SNP genotyping by KASP. We, therefore, selected *MSH3* rs1382539 instead of rs557874766 because both SNPs are in high linkage disequilibrium ( $r^2 = 0.97$ ,  $D' = 1$  in the TRACK-HD cohort) and because rs1382539 genotypes were available for the TRACK-HD cohort. SNPs considered for replication in the Enroll-HD cohort were selected as the top eight most significantly associated SNPs ( $p < 0.1$ ) in the TRACK-HD cohort in a preliminary analysis using a slightly larger TRACK-HD cohort including four participants with 39 pure CAG repeats ( $Q^1 = 39$ ) and six non-Caucasians. In the preliminary analysis, the association between somatic expansion score and rs20579 in *LIG1* was  $p = 0.072$ , and rs20579 was thus selected for replication in Enroll-HD. Conversely, in the same preliminary analysis, rs11061229 and rs72810940 did not reach the selection threshold of  $p < 0.10$ , and thus were not chosen for replication in Enroll-HD. KASP assays were already available for four out of these eight SNPs<sup>4</sup> (*MLH3* rs175080, *FAN1* rs3512, *LIG1* rs20579 and *MLH1* rs1799977). KASP assay design and validation was attempted by LGC Genomics for the remaining four SNPs (*MTMR10* rs2140734, *RP11-481J13.1* rs147804330, *MSH3* rs1382539 and *MLH1* rs144287831). KASP assays could not be validated for *MTMR10* rs2140734 and *MLH1* rs144287831. Six candidate SNPs were thus genotyped in the Enroll-HD replication cohort. SNP genotyping using these six KASP assays was performed by LGC Genomics. Hardy-Weinberg equilibrium tests were performed as quality control of the KASP genotyping for these six SNPs. None of these six SNPs was in significant deviation from Hardy-Weinberg equilibrium after correction for multiple testing ( $p$ -values  $> 0.22$  after correction for multiple testing).

### I.1.10. Availability of code and software used

The *HTT* exon one repeat region was genotyped from the MiSeq reads generated using ScaleHD (version 0.251) (<https://github.com/helloabunai/ScaleHD>). ScaleHD utilises a number of Python dependencies: cutadapt (version 1.9.1) (<http://cutadapt.readthedocs.io/en/v1.9.1/>); generatr (version 0.252) (<https://github.com/helloabunai/RefGeneratr>); lxml (version 4.0.0) (<http://lxml.de>); numpy (version 1.13.1) (<http://www.numpy.org>); pandas (version 0.14.1) (<https://pandas.pydata.org>); peakutils (version 1.0.3) (<https://pypi.org/project/PeakUtils/1.0.3>); pysam (version 0.9.1.4) (<https://github.com/pysam-developers/pysam>); regex (version 2017.1.17) (<https://pypi.org/project/regex/>); scipy (version 0.17.1) (<https://www.scipy.org/scipylib/index.html>); and sklearn (version 0.19.1) (<http://scikit-learn.org/stable/>). In addition to a number of third party binaries: Java (version 1.8.0\_20) (<https://java.com/en/>); SeqTK (version 1.2-r101-dirty) (<https://github.com/lh3/seqtk>); BWA-MEM (version 0.7.15-r1140) (<https://github.com/lh3/bwa/releases/tag/v0.7.15>); and Samtools (version 1.3.1) (<https://sourceforge.net/projects/samtools/files/samtools/1.3.1/>). Sequence alignments were visually inspected in Tablet (version 1.17.08.17) (<https://ics.hutton.ac.uk/tablet/>). Statistical analyses were undertaken in R (version 3.4.3) (<https://www.r-project.org>) using RStudio (version 1.0.153) (<https://www.rstudio.com>). Genetic association studies were undertaken using PLINK (version 1.07) through gPLINK (version 2.050) (<http://zzz.bwh.harvard.edu/plink/gplink.shtml>). The meta-analysis of the SNP association tests was performed using METAL (<http://csg.sph.umich.edu/abecasis/metal/>).

R functions and packages: multiple linear regressions were performed using the function `stats::lm`; comparison of linear models and Cox regressions were performed using the `stats::anova` function; least-square means and their confidence intervals were estimated using the `emmeans` package (version 1.3.4);<sup>17</sup> Cox proportional hazard regressions were performed using the `survival::coxph` function (version 2.38);<sup>18,19</sup> the proportional hazard assumption for each Cox regression model fit and each covariate was tested using the `survival::cox.zph` function;<sup>18,19</sup> adjusted survival curves were produced using the `survminer` package (version 0.4.3);<sup>20</sup> bootstrapping and estimation of the confidence interval of the difference between goodness of fit statistics were performed using the `boot` package (version 1.3-22);<sup>21,22</sup> and mixed effect models were performed using the function `lme4::lmer`.<sup>23</sup>

## II. Supplementary tables

**Table S1: Literature review of atypical *HTT* exon one repeat structures and their association with Huntington disease clinical outcomes and genetic instability.** This literature review was performed as described in the Research in Context section.

| Reference                                    | Atypical allele structure(s) described                                                                                                                                            | Number of atypical HD-causing alleles | Association with clinical outcomes, germline instability and/or somatic instability                                                                                                                                                                                |
|----------------------------------------------|-----------------------------------------------------------------------------------------------------------------------------------------------------------------------------------|---------------------------------------|--------------------------------------------------------------------------------------------------------------------------------------------------------------------------------------------------------------------------------------------------------------------|
| Pêcheux <i>et al.</i> , 1995 <sup>24</sup>   | (CAG) <sub>n</sub> --- (CAACAG) <sub>2</sub> (CCGCCA) <sub>1</sub> (CCG) <sub>7</sub>                                                                                             | 2                                     | Not investigated.                                                                                                                                                                                                                                                  |
| Goldberg <i>et al.</i> , 1995 <sup>25</sup>  | (CAG) <sub>n</sub> --- (CAACAG) <sub>0</sub> (CCGCCA) <sub>0</sub> (CCG) <sub>9</sub>                                                                                             | 4 from one family                     | Germline instability: unusually large intergenerational jump from an intermediate allele into the disease range within one family.                                                                                                                                 |
| Gellera <i>et al.</i> , 1996 <sup>26</sup>   | (CAG) <sub>45</sub> --- (CAACAG) <sub>0</sub> (CCGCCA) <sub>1</sub> (CCG) <sub>10</sub><br>(CAG) <sub>n</sub> --- (CAACAG) <sub>0</sub> (CCGCCA) <sub>1</sub> (CCG) <sub>n</sub>  | 3                                     | Not investigated.                                                                                                                                                                                                                                                  |
| Chong <i>et al.</i> , 1997 <sup>27</sup>     | (CAG) <sub>33</sub> --- (CAACAG) <sub>0</sub> (CCGCCA) <sub>0</sub> (CCG) <sub>12</sub><br>(CAG) <sub>36</sub> --- (CAACAG) <sub>0</sub> (CCGCCA) <sub>0</sub> (CCG) <sub>9</sub> | 2 from two families                   | Germline instability: higher frequency of sperm carrying HD-causing alleles in two individuals, carrying intermediate atypical alleles (the individual carrying an allele with nine CCGs belonged to the family described by Goldberg <i>et al.</i> 1995).         |
| Margolis <i>et al.</i> , 1999 <sup>28</sup>  | (CAG) <sub>27</sub> --- (CAACAG) <sub>1</sub> (CCGCCA) <sub>0</sub> (CCG) <sub>12</sub>                                                                                           | 1                                     | Not investigated.                                                                                                                                                                                                                                                  |
| Kelly <i>et al.</i> , 1999 <sup>29</sup>     | (CAG) <sub>n</sub> --- (CAACAG) <sub>0</sub> (CCGCCA) <sub>0</sub> (CCG) <sub>9</sub>                                                                                             | 1 from one family                     | Germline instability: unusual germline expansion from an intermediate 27-repeat allele to a disease-associated 38-repeat allele.                                                                                                                                   |
| Williams <i>et al.</i> , 2000 <sup>30</sup>  | (CAG) <sub>n</sub> --- (CAACAG) <sub>0</sub> (CCGCCA) <sub>0</sub> (CCG) <sub>n</sub>                                                                                             | 8 from three families                 | Clinical outcome: One individual with 37 pure CAGs with mild symptoms of HD.<br>Germline instability: Allele structure not associated with particularly high germline instability.<br>Somatic instability: Allele structure not associated with somatic mosaicism. |
| Yu <i>et al.</i> , 2000 <sup>12</sup>        | (CAG) <sub>n</sub> --- (CAACAG) <sub>2</sub> (CCGCCA) <sub>1</sub> (CCG) <sub>n</sub><br>(CAG) <sub>19</sub> CAA (CAACAG) <sub>1</sub> (CCGCCA) <sub>1</sub> (CCG) <sub>n</sub>   | 5                                     | Not investigated.                                                                                                                                                                                                                                                  |
| Nørremølle <i>et al.</i> 2009 <sup>31</sup>  | (CAG) <sub>n</sub> --- (CAACAG) <sub>2</sub> (CCGCCA) <sub>1</sub> (CCG) <sub>7</sub>                                                                                             | 1                                     | Clinical outcome: The <i>HTT</i> haplotype of the atypical allele sequenced is the same as the HD-onset-delaying haplotype described in 47 other individuals.                                                                                                      |
| Houge <i>et al.</i> , 2013 <sup>32</sup>     | (CAG) <sub>n</sub> --- (CAACAG) <sub>1</sub> (CCGCCA) <sub>0</sub> (CCG) <sub>9</sub>                                                                                             | 2 from one family                     | Germline instability: Unusual germline expansion from a 26-repeat allele to a disease-associated 44 repeat allele.                                                                                                                                                 |
| Bečanović <i>et al.</i> , 2015 <sup>33</sup> | (CAG) <sub>n</sub> --- (CAACAG) <sub>2</sub> (CCGCCA) <sub>1</sub> (CCG) <sub>7</sub>                                                                                             | 26                                    | Clinical outcome: The atypical alleles sequenced are in linkage disequilibrium with the rs13102260 minor (A) variant which is associated with <i>HTT</i> expression and HD onset.                                                                                  |

**Table S2: Linear regression models of the relationships between allele length, age and sequence structures with somatic expansions in Huntington disease.** The table shows the squared coefficient of correlation ( $r^2$ , raw and adjusted) and statistical significance ( $p$ ) for each model, and the coefficient and 95% confidence interval,  $t$ -statistic ( $t$ ), statistical significance ( $p$ ) and the  $p$ -value adjusted for multiple testing using the Benjamini-Hochberg false discovery rate correction<sup>34</sup> ( $pFDR$ ) associated with each parameter in the model. The coefficient provides an indication of the relative weight of the contribution, and effect size, of each parameter to the model and its associated 95% confidence interval. The  $t$ -statistic and corresponding  $p$ -value provide an indication of the statistical significance that the parameter is adding explanatory power to the model. SE: ratio of somatic expansions.  $Q^T$ : total number of glutamines in the disease-associated allele (centred values).  $Q^1$ : number of pure CAGs in the disease-associated allele (centred values). Age: age at DNA sampling in years (centred values). Sex: factor, male or female. Cohort: factor, TRACK-HD ( $n = 203$ ) or Enroll-HD ( $n = 531$ ).  $Q^2$ : factor, number of additional glutamine codons in the disease-associated allele, 0 ( $n = 7$ ), 2 ( $n = 714$ ) or 4 ( $n = 13$ ). Models SEQ<sup>1</sup> and SEQ<sup>1</sup>Q<sup>2</sup> were compared with an ANOVA and the  $p$ -value associated with the  $F$ -statistic was then estimated based on  $10^5$  permutations of  $Q^2$  ( $F = 1.93, p = 0.10$ ). †:  $p$ -values were estimated using  $10^5$  permutations of the number of additional glutamine codons ( $Q^2$ ).

|                  | Model                                                    | $r^2$ | Adjusted $r^2$ | Model $p$              | Parameter values  |             |                         |              |       |                        |                        |
|------------------|----------------------------------------------------------|-------|----------------|------------------------|-------------------|-------------|-------------------------|--------------|-------|------------------------|------------------------|
|                  |                                                          |       |                |                        | Parameter         | Coefficient | Lower 95% CI            | Upper 95% CI | $t$   | $p$                    | $pFDR$                 |
| SEQ <sup>T</sup> | $\ln(SE) \sim Q^T + Age + Q^T \times Age + Sex + Cohort$ | 0.822 | 0.821          | <2 x 10 <sup>-16</sup> | intercept         | -0.987      | -1.010                  | -0.964       | -85.1 | <2 x 10 <sup>-16</sup> | <2 x 10 <sup>-16</sup> |
|                  |                                                          |       |                |                        | $Q^T$             | 0.209       | 0.201                   | 0.217        | 51.7  | <2 x 10 <sup>-16</sup> | <2 x 10 <sup>-16</sup> |
|                  |                                                          |       |                |                        | Age               | 0.017       | 0.015                   | 0.018        | 21.9  | <2 x 10 <sup>-16</sup> | <2 x 10 <sup>-16</sup> |
|                  |                                                          |       |                |                        | $Q^T \times Age$  | 0.000       | -3.9 x 10 <sup>-5</sup> | 0.001        | 1.8   | 0.069                  | 0.12                   |
|                  |                                                          |       |                |                        | Sex = male        | 0.009       | -0.020                  | 0.038        | 0.58  | 0.56                   | 0.62                   |
|                  |                                                          |       |                |                        | Cohort = TRACK-HD | -0.014      | -0.047                  | 0.019        | -0.85 | 0.40                   | 0.51                   |
| SEQ <sup>1</sup> | $\ln(SE) \sim Q^1 + Age + Q^1 \times Age + Sex + Cohort$ | 0.836 | 0.835          | <2 x 10 <sup>-16</sup> | intercept         | -0.986      | -1.008                  | -0.964       | -88.2 | <2 x 10 <sup>-16</sup> | <2 x 10 <sup>-16</sup> |
|                  |                                                          |       |                |                        | $Q^1$             | 0.220       | 0.212                   | 0.228        | 54.0  | <2 x 10 <sup>-16</sup> | <2 x 10 <sup>-16</sup> |
|                  |                                                          |       |                |                        | Age               | 0.018       | 0.016                   | 0.019        | 24.1  | <2 x 10 <sup>-16</sup> | <2 x 10 <sup>-16</sup> |
|                  |                                                          |       |                |                        | $Q^1 \times Age$  | 0.001       | 0.000                   | 0.001        | 3.3   | 0.001                  | 0.002                  |
|                  |                                                          |       |                |                        | Sex = male        | 0.010       | -0.018                  | 0.038        | 0.72  | 0.47                   | 0.56                   |
|                  |                                                          |       |                |                        | Cohort = TRACK-HD | -0.002      | -0.033                  | 0.030        | -0.11 | 0.91                   | 0.91                   |

Continued



**Table S2: continued**

|                                 | Model                                                                                               | $r^2$ | Adjusted $r^2$ | Model $p$              | Parameter values         |             |              |              |       |                        |                        |
|---------------------------------|-----------------------------------------------------------------------------------------------------|-------|----------------|------------------------|--------------------------|-------------|--------------|--------------|-------|------------------------|------------------------|
|                                 |                                                                                                     |       |                |                        | Parameter                | Coefficient | Lower 95% CI | Upper 95% CI | $t$   | $p$                    | $pFDR$                 |
| SEQ <sup>1</sup> Q <sup>2</sup> | $\ln(SE) \sim Q^1 + Age + Q^1 \times Age$<br>+ Sex + Cohort + Q <sup>2</sup> + Q <sup>2</sup> x Age | 0.838 | 0.835          | <2 x 10 <sup>-16</sup> | intercept                | -0.987      | -1.009       | -0.965       | -88.2 | <2 x 10 <sup>-16</sup> | <2 x 10 <sup>-16</sup> |
|                                 |                                                                                                     |       |                |                        | Q <sup>1</sup>           | 0.219       | 0.211        | 0.227        | 53.5  | <2 x 10 <sup>-16</sup> | <2 x 10 <sup>-16</sup> |
|                                 |                                                                                                     |       |                |                        | Age                      | 0.018       | 0.016        | 0.019        | 23.8  | <2 x 10 <sup>-16</sup> | <2 x 10 <sup>-16</sup> |
|                                 |                                                                                                     |       |                |                        | Q <sup>1</sup> x Age     | 0.001       | 0.000        | 0.001        | 3.1   | 0.002                  | 0.004                  |
|                                 |                                                                                                     |       |                |                        | Sex = male               | 0.010       | -0.018       | 0.038        | 0.70  | 0.48                   | 0.56                   |
|                                 |                                                                                                     |       |                |                        | Cohort = TRACK-HD        | -0.002      | -0.034       | 0.029        | -0.14 | 0.89                   | 0.91                   |
|                                 |                                                                                                     |       |                |                        | Q <sup>2</sup> = 0       | -0.085      | -0.227       | 0.057        | -1.17 | 0.23 <sup>+</sup>      | 0.36                   |
|                                 |                                                                                                     |       |                |                        | Q <sup>2</sup> = 4       | 0.063       | -0.044       | 0.171        | 1.16  | 0.24 <sup>+</sup>      | 0.36                   |
|                                 |                                                                                                     |       |                |                        | Q <sup>2</sup> = 0 x Age | -0.011      | -0.023       | 0.000        | -1.89 | 0.06 <sup>+</sup>      | 0.12                   |
|                                 |                                                                                                     |       |                |                        | Q <sup>2</sup> = 4 x Age | 0.005       | -0.006       | 0.015        | 0.86  | 0.40 <sup>+</sup>      | 0.51                   |

**Table S3: Cox regression models of the relationship between allele length, sequence structure and somatic expansion scores with time to onset of Huntington disease motor symptoms.** The table shows the number of events (motor onset), log-likelihood, statistical significance ( $p$ ) for each model, and the hazard ratio and 95% confidence interval,  $z$ -statistic ( $z$ ), statistical significance ( $p$ ) and the  $p$ -value adjusted for multiple testing using the Benjamini-Hochberg false discovery rate correction<sup>34</sup> ( $pFDR$ ), associated with each parameter in the model. The hazard ratio indicates the relative increase in the risk of motor onset associated with a 1 unit increase in the parameter. The  $z$ -statistic and corresponding  $p$ -value provide an indication of the statistical significance that the parameter is adding explanatory power to the model.  $Q^T$ : total number of glutamines in the disease-associated allele.  $Q^1$ : number of pure CAGs in the disease-associated allele.  $Q^{FL}$ : number of CAGs estimated by fragment length analysis.  $SEQ^1$ : somatic expansion score (residuals of model SEQ1 (table S2, appendix), *i.e.* residual variation in the somatic expansion ratio not accounted for by  $Q^1$ , age at sampling and their interaction).  $Q^2$ : factor, number of additional glutamine codons in the disease-associated allele ( $Q^2$  0 ( $n = 7$ ), 2 ( $n = 714$ ) or 4 ( $n = 13$ )). Sex (male or female) and cohort (TRACK-HD ( $n = 203$ ) or Enroll-HD ( $n = 531$ )) were used as strata in the analyses. Models  $AAOQ^1$  and  $AAOQ^1Q^2$  were compared with an ANOVA and the  $p$ -value associated with the  $\chi^2$ -statistic was then estimated based on  $10^5$  permutations of  $Q^2$  ( $\chi^2 = 11.3$ ,  $p = 0.002$ ). <sup>+</sup>:  $p$ -values were estimated using  $10^5$  permutations of the number of additional glutamine codons ( $Q^2$ ).

| Model                             |                                                                                                            | Events | Log-likelihood | Model $p$              | Parameter values   |              |              |              |       |                         |                         |
|-----------------------------------|------------------------------------------------------------------------------------------------------------|--------|----------------|------------------------|--------------------|--------------|--------------|--------------|-------|-------------------------|-------------------------|
|                                   |                                                                                                            |        |                |                        | Parameter          | Hazard ratio | Lower 95% CI | Upper 95% CI | $z$   | $p$                     | $pFDR$                  |
| AAOQ <sup>T</sup>                 | <i>time to HD motor signs</i> ~ $Q^T + SEQ^1$<br>+ <i>strata</i> (Sex) + <i>strata</i> (Cohort)            | 488    | -1,899         | <2 x 10 <sup>-16</sup> | Q <sup>T</sup>     | 1.71         | 1.63         | 1.80         | 21.96 | <2 x 10 <sup>-16</sup>  | <2 x 10 <sup>-16</sup>  |
|                                   |                                                                                                            |        |                |                        | SEQ <sup>1</sup>   | 2.56         | 1.61         | 4.05         | 3.99  | 6.6 x 10 <sup>-5</sup>  | 8.8 x 10 <sup>-5</sup>  |
| AAOQ <sup>1</sup>                 | <i>time to HD motor signs</i> ~ $Q^1 + SEQ^1$<br>+ <i>strata</i> (Sex) + <i>strata</i> (Cohort)            | 488    | -1,884         | <2 x 10 <sup>-16</sup> | Q <sup>1</sup>     | 1.80         | 1.69         | 1.87         | 22.48 | <2 x 10 <sup>-16</sup>  | <2 x 10 <sup>-16</sup>  |
|                                   |                                                                                                            |        |                |                        | SEQ <sup>1</sup>   | 2.81         | 1.79         | 4.42         | 4.48  | 7.6 x 10 <sup>-6</sup>  | 1.3 x 10 <sup>-5</sup>  |
| AAOQ <sup>1</sup> Q <sup>2</sup>  | <i>time to HD motor signs</i> ~ $Q^1 + SEQ^1$<br>+ <i>strata</i> (Sex) + <i>strata</i> (Cohort) + $Q^2$    | 488    | -1,878         | <2 x 10 <sup>-16</sup> | Q <sup>1</sup>     | 1.79         | 1.70         | 1.89         | 22.64 | <2 x 10 <sup>-16</sup>  | <2 x 10 <sup>-16</sup>  |
|                                   |                                                                                                            |        |                |                        | SEQ <sup>1</sup>   | 3.05         | 1.94         | 4.80         | 4.84  | 1.3 x 10 <sup>-6</sup>  | 2.8 x 10 <sup>-6</sup>  |
|                                   |                                                                                                            |        |                |                        | Q <sup>2</sup> = 0 | 5.19         | 2.38         | 11.32        | 4.14  | 6.1 x 10 <sup>-4+</sup> | 7.3 x 10 <sup>-4</sup>  |
|                                   |                                                                                                            |        |                |                        | Q <sup>2</sup> = 4 | 1.02         | 0.56         | 1.88         | 0.07  | 0.95 <sup>+</sup>       | 0.95                    |
| AAOQ <sup>FL</sup> Q <sup>2</sup> | <i>time to HD motor signs</i> ~ $Q^{FL} + SEQ^1$<br>+ <i>strata</i> (Sex) + <i>strata</i> (Cohort) + $Q^2$ | 488    | -1,878         | <2 x 10 <sup>-16</sup> | Q <sup>FL</sup>    | 1.79         | 1.70         | 1.89         | 22.64 | <2 x 10 <sup>-16</sup>  | <2 x 10 <sup>-16</sup>  |
|                                   |                                                                                                            |        |                |                        | SEQ <sup>1</sup>   | 3.05         | 1.94         | 4.79         | 4.82  | 1.4 x 10 <sup>-6</sup>  | 2.8 x 10 <sup>-6</sup>  |
|                                   |                                                                                                            |        |                |                        | Q <sup>2</sup> = 0 | 16.65        | 7.48         | 37.06        | 6.89  | <1 x 10 <sup>-5+</sup>  | <1.5 x 10 <sup>-5</sup> |
|                                   |                                                                                                            |        |                |                        | Q <sup>2</sup> = 4 | 0.57         | 0.31         | 1.05         | -1.79 | 0.10 <sup>+</sup>       | 0.11                    |

**Table S4: Linear regression models of the relationship between sequence structure and somatic expansions scores with disease progression in Huntington disease.** The table shows the squared coefficient of correlation ( $r^2$ , raw and adjusted) and statistical significance ( $p$ ) for each model, and the coefficient and 95% confidence interval,  $t$ -statistic ( $t$ ), statistical significance ( $p$ ) and  $p$ -value adjusted for multiple testing using the Benjamini-Hochberg false discovery rate correction<sup>34</sup> ( $pFDR$ ) associated with each parameter in the model. The coefficient provides an indication of the relative weight of the contribution and effect size of each parameter to the model and its associated 95% confidence interval. The  $t$ -statistic and corresponding  $p$ -value provide an indication of the statistical significance that the parameter is adding explanatory power to the model. SEQ<sup>1</sup>: somatic expansion score (residuals of model SEQ1 (table S2, appendix), *i.e.* residual variation in SE not accounted for by Q<sup>1</sup>, age at sampling and their interaction). Q<sup>FL</sup>Prog: TRACK-HD progression score based on the fragment length estimated number of CAGs (Q<sup>FL</sup>) in the disease-associated allele. Q<sup>1</sup>Prog: TRACK-HD progression score based on the number of pure CAGs (Q<sup>1</sup>) in the disease-associated allele. Sex: factor, male or female. Cohort: TRACK-HD ( $n = 203$ ). Q<sup>2</sup>: factor, number of additional glutamine codons in the disease-associated allele (Q<sup>2</sup>) 0 ( $n = 2$ ), 2 ( $n = 195$ ) or 4 ( $n = 6$ ). <sup>+</sup>:  $p$ -values were estimated using  $10^5$  permutations of the number of additional glutamine codons (Q<sup>2</sup>).

|                     | Model                               | $r^2$ | Adjusted $r^2$ | Model $p$            | Parameter values   |             |              |              |       |                        |                       |
|---------------------|-------------------------------------|-------|----------------|----------------------|--------------------|-------------|--------------|--------------|-------|------------------------|-----------------------|
|                     |                                     |       |                |                      | Parameter          | Coefficient | Lower 95% CI | Upper 95% CI | $t$   | $p$                    | $pFDR$                |
| ProgQ <sup>1</sup>  | $Q^1Prog \sim Q^2 + SEQ^1 + Sex$    | 0.098 | 0.080          | $3.9 \times 10^{-4}$ | intercept          | -0.001      | -0.181       | 0.179        | -0.01 | 0.991                  | 0.991                 |
|                     |                                     |       |                |                      | Q <sup>2</sup> = 0 | 2.237       | 0.891        | 3.582        | 3.28  | 0.003 <sup>+</sup>     | 0.014                 |
|                     |                                     |       |                |                      | Q <sup>2</sup> = 4 | -0.743      | -1.535       | 0.049        | -1.85 | 0.065 <sup>+</sup>     | 0.110                 |
|                     |                                     |       |                |                      | SEQ <sup>1</sup>   | 0.983       | 0.243        | 1.722        | 2.62  | 0.009                  | 0.028                 |
|                     |                                     |       |                |                      | Sex = male         | 0.002       | -0.267       | 0.272        | 0.02  | 0.987                  | 0.991                 |
| ProgQ <sup>FL</sup> | $Q^{FL}Prog \sim Q^2 + SEQ^1 + Sex$ | 0.153 | 0.136          | $1.1 \times 10^{-6}$ | intercept          | -0.008      | -0.183       | 0.167        | -0.09 | 0.927                  | 0.991                 |
|                     |                                     |       |                |                      | Q <sup>2</sup> = 0 | 3.127       | 1.824        | 4.431        | 4.73  | <1 x 10 <sup>-5+</sup> | <1 x 10 <sup>-4</sup> |
|                     |                                     |       |                |                      | Q <sup>2</sup> = 4 | -0.990      | -1.758       | -0.223       | -2.55 | 0.013 <sup>+</sup>     | 0.028                 |
|                     |                                     |       |                |                      | SEQ <sup>1</sup>   | 0.903       | 0.186        | 1.620        | 2.48  | 0.014                  | 0.028                 |
|                     |                                     |       |                |                      | Sex = male         | 0.015       | -0.247       | 0.276        | 0.11  | 0.912                  | 0.991                 |

**Table S5: Linear regression models of the relationship between sequence structure and somatic expansions scores with the rate of change of TMS and TFC in Huntington disease.** The table shows the squared coefficient of correlation ( $r^2$ , raw and adjusted) and statistical significance ( $p$ ) for each model, and the coefficient and 95% confidence interval,  $t$ -statistic ( $t$ ), statistical significance ( $p$ ) and the  $p$ -value adjusted for multiple testing using the Benjamini-Hochberg false discovery rate correction<sup>34</sup> ( $pFDR$ ) associated with each parameter in the model. The coefficient provides an indication of the relative weight of the contribution of each parameter to the model and its associated 95% confidence interval. The  $t$ -statistic and corresponding  $p$ -value provide an indication of the statistical significance that the parameter is adding explanatory power to the model. TMSrate and TFCrate were derived from three-year longitudinal data using random slope and random intercept mixed effect models (with a fixed ‘years of follow-up’ effect and a random ‘participant’ effect) to estimate the rate of change of TMC and TFC for each participant.  $Q^1$ : number of pure CAGs in the disease-associated allele (centred values). BaselineTMS: TMS at baseline (centred values). BaselineTFC: TFC at baseline (centred values). Age<sub>b</sub>: Age at baseline in years (centred values). Sex: factor, male or female. SEQ<sup>1</sup>: somatic expansion score (residuals of model SEQ1 (table S2, appendix), *i.e.* residual variation in SE not accounted for by  $Q^1$ , age at sampling and their interaction).  $Q^2$ : number of additional glutamine codons in the disease-associated allele ( $Q^2$ ) 0 ( $n = 2$ ), 2 ( $n = 195$ ), or 4 ( $n = 6$ ). Cohort: TRACK-HD ( $n = 203$ ). <sup>+</sup>:  $p$ -values were estimated using  $10^5$  permutations of the number of additional glutamine codons ( $Q^2$ ).

|                  | Model                                                                      | $r^2$  | Adjusted $r^2$ | Model $p$               | Parameter values         |             |              |              |        |                         |                         |
|------------------|----------------------------------------------------------------------------|--------|----------------|-------------------------|--------------------------|-------------|--------------|--------------|--------|-------------------------|-------------------------|
|                  |                                                                            |        |                |                         | Parameter                | Coefficient | Lower 95% CI | Upper 95% CI | $t$    | $p$                     | $pFDR$                  |
| TMSrate $Q^1Q^2$ | $TMSrate \sim BaselineTMS + Age_b + Q^1 + Age_b * Q^1 + Q^2 + SEQ^1 + Sex$ | 0.434  | 0.410          | <2 x 10 <sup>-16</sup>  | intercept                | 2.102       | 1.829        | 2.374        | 15.211 | <2 x 10 <sup>-16</sup>  | <2 x 10 <sup>-16</sup>  |
|                  |                                                                            |        |                |                         | BaselineTMS              | 0.042       | 0.020        | 0.063        | 3.865  | 1.5 x 10 <sup>-4</sup>  | 4.5 x 10 <sup>-4</sup>  |
|                  |                                                                            |        |                |                         | Age <sub>b</sub>         | 0.068       | 0.030        | 0.106        | 3.501  | 5.8 x 10 <sup>-4</sup>  | 1.5 x 10 <sup>-3</sup>  |
|                  |                                                                            |        |                |                         | $Q^1$                    | 0.461       | 0.294        | 0.629        | 5.433  | 1.7 x 10 <sup>-7</sup>  | 9.6 x 10 <sup>-7</sup>  |
|                  |                                                                            |        |                |                         | Age <sub>b</sub> * $Q^1$ | 0.008       | 0.000        | 0.017        | 1.874  | 0.062                   | 0.093                   |
|                  |                                                                            |        |                |                         | $Q^2 = 0$                | 0.946       | -0.916       | 2.808        | 1.002  | 0.255 <sup>+</sup>      | 0.328                   |
|                  |                                                                            |        |                |                         | $Q^2 = 4$                | -0.254      | -1.359       | 0.851        | -0.454 | 0.627 <sup>+</sup>      | 0.664                   |
|                  |                                                                            |        |                |                         | SEQ <sup>1</sup>         | 1.743       | 0.730        | 2.755        | 3.394  | 8.4 x 10 <sup>-4</sup>  | 1.9 x 10 <sup>-3</sup>  |
| Sex = male       | -0.296                                                                     | -0.667 | 0.076          | -1.571                  | 0.118                    | 0.163       |              |              |        |                         |                         |
| TFCrate $Q^1Q^2$ | $TFCrate \sim BaselineTFC + Age_b + Q^1 + Age_b * Q^1 + Q^2 + SEQ^1 + Sex$ | 0.307  | 0.278          | 1.8 x 10 <sup>-12</sup> | intercept                | -0.354      | -0.446       | -0.262       | -7.573 | 1.4 x 10 <sup>-12</sup> | 1.3 x 10 <sup>-11</sup> |
|                  |                                                                            |        |                |                         | BaselineTFC              | 0.051       | 0.007        | 0.094        | 2.277  | 0.024                   | 0.039                   |
|                  |                                                                            |        |                |                         | Age <sub>b</sub>         | -0.030      | -0.041       | -0.019       | -5.380 | 2.1 x 10 <sup>-7</sup>  | 9.6 x 10 <sup>-7</sup>  |
|                  |                                                                            |        |                |                         | $Q^1$                    | -0.129      | -0.178       | -0.080       | -5.188 | 5.3 x 10 <sup>-7</sup>  | 1.9 x 10 <sup>-6</sup>  |
|                  |                                                                            |        |                |                         | Age <sub>b</sub> * $Q^1$ | -0.004      | -0.007       | -0.001       | -2.730 | 0.007                   | 0.014                   |
|                  |                                                                            |        |                |                         | $Q^2 = 0$                | -0.830      | -1.453       | -0.208       | -2.632 | 0.021 <sup>+</sup>      | 0.038                   |
|                  |                                                                            |        |                |                         | $Q^2 = 4$                | 0.146       | -0.227       | 0.519        | 0.771  | 0.439 <sup>+</sup>      | 0.527                   |
|                  |                                                                            |        |                |                         | SEQ <sup>1</sup>         | -0.118      | -0.463       | 0.226        | -0.677 | 0.499                   | 0.561                   |
| Sex = male       | -0.003                                                                     | -0.128 | 0.123          | -0.044                  | 0.965                    | 0.965       |              |              |        |                         |                         |

**Table S6: Linear regression models of the relationship between sequence structure and somatic expansions scores with TMS in Huntington disease.** The table shows the squared coefficient of correlation ( $r^2$ , raw and adjusted) and statistical significance ( $p$ ) for each model, and the coefficient and 95% confidence interval,  $t$ -statistic ( $t$ ), statistical significance ( $p$ ) and  $p$ -value adjusted for multiple testing using the Benjamini-Hochberg false discovery rate correction<sup>34</sup> ( $pFDR$ ) associated with each parameter in the model. The coefficient provides an indication of the relative weight of the contribution of each parameter to the model and its associated 95% confidence interval. The  $t$ -statistic and corresponding  $p$ -value provide an indication of the statistical significance that the parameter is adding explanatory power to the model.  $\text{Sqrt}(TMS_b)$ : The square-root of TMS at baseline. Cohort: factor, TRACK-HD ( $n = 203$ ) or Enroll-HD ( $n = 531$ ).  $SEQ^1$ : somatic expansion score (residuals of model SEQ1 (table S2, appendix), *i.e.* residual variation in SE not accounted for by  $Q^1$ , age at sampling and their interaction).  $Q^T$ : total number of encoded-glutamines in the disease-associated allele (centred values).  $Q^1$ : number of pure CAGs in the disease-associated allele (centred values).  $Q^{FL}$ : number of CAGs estimated by fragment length analysis (centred values). Age<sub>b</sub>: Age at baseline in years (centred values). Sex: factor, male or female.  $Q^2$ : factor, number of additional glutamine codons in the disease-associated allele ( $Q^2$ ) 0, ( $n = 7$ ), 2 ( $n = 714$ ) or 4 ( $n = 13$ ). Models  $TMSQ^1$  and  $TMSQ^1Q^2$  were compared with an ANOVA and the  $p$ -value associated with the  $F$ -statistic was estimated based on  $10^5$  permutations of  $Q^2$  ( $F = 7.66$ ,  $p = 6.3 \times 10^{-4}$ ).

|          | Model                                                                                                  | $r^2$ | Adjusted $r^2$ | Model $p$            | Parameter values         |             |              |              |      |                      |                       |
|----------|--------------------------------------------------------------------------------------------------------|-------|----------------|----------------------|--------------------------|-------------|--------------|--------------|------|----------------------|-----------------------|
|          |                                                                                                        |       |                |                      | Parameter                | Coefficient | Lower 95% CI | Upper 95% CI | $t$  | $p$                  | $pFDR$                |
| $TMSQ^T$ | $\text{Sqrt}(TMS_b) \sim \text{Age}_b + Q^T + \text{Age}_b * Q^T + SEQ^1 + \text{Sex} + \text{Cohort}$ | 0.558 | 0.554          | $<2 \times 10^{-16}$ | intercept                | 4.184       | 4.003        | 4.365        | 45.4 | $<2 \times 10^{-16}$ | $<2 \times 10^{-16}$  |
|          |                                                                                                        |       |                |                      | Age <sub>b</sub>         | 0.167       | 0.155        | 0.178        | 27.6 | $<2 \times 10^{-16}$ | $<2 \times 10^{-16}$  |
|          |                                                                                                        |       |                |                      | $Q^T$                    | 0.650       | 0.587        | 0.713        | 20.2 | $<2 \times 10^{-16}$ | $<2 \times 10^{-16}$  |
|          |                                                                                                        |       |                |                      | Age <sub>b</sub> * $Q^T$ | 0.013       | 0.009        | 0.017        | 5.9  | $6 \times 10^{-9}$   | $1.2 \times 10^{-8}$  |
|          |                                                                                                        |       |                |                      | $SEQ^1$                  | 0.971       | 0.369        | 1.574        | 3.2  | $1.6 \times 10^{-3}$ | $2.0 \times 10^{-3}$  |
|          |                                                                                                        |       |                |                      | Sex = male               | -0.019      | -0.250       | 0.212        | -0.2 | 0.871                | 0.911                 |
|          |                                                                                                        |       |                |                      | Cohort = TRACK-HD        | -0.560      | -0.820       | -0.300       | -4.2 | $3 \times 10^{-5}$   | $4.6 \times 10^{-5}$  |
| $TMSQ^1$ | $\text{Sqrt}(TMS_b) \sim \text{Age}_b + Q^1 + \text{Age}_b * Q^1 + SEQ^1 + \text{Sex} + \text{Cohort}$ | 0.578 | 0.575          | $<2 \times 10^{-16}$ | intercept                | 4.205       | 4.027        | 4.382        | 46.5 | $<2 \times 10^{-16}$ | $<2 \times 10^{-16}$  |
|          |                                                                                                        |       |                |                      | Age <sub>b</sub>         | 0.173       | 0.161        | 0.184        | 28.8 | $<2 \times 10^{-16}$ | $<2 \times 10^{-16}$  |
|          |                                                                                                        |       |                |                      | $Q^1$                    | 0.706       | 0.642        | 0.771        | 21.5 | $<2 \times 10^{-16}$ | $<2 \times 10^{-16}$  |
|          |                                                                                                        |       |                |                      | Age <sub>b</sub> * $Q^1$ | 0.015       | 0.011        | 0.019        | 7.0  | $7 \times 10^{-12}$  | $1.5 \times 10^{-11}$ |
|          |                                                                                                        |       |                |                      | $SEQ^1$                  | 1.066       | 0.478        | 1.655        | 3.6  | $4 \times 10^{-4}$   | $5.1 \times 10^{-04}$ |
|          |                                                                                                        |       |                |                      | Sex = male               | -0.017      | -0.243       | 0.209        | -0.1 | 0.883                | 0.911                 |
|          |                                                                                                        |       |                |                      | Cohort = TRACK-HD        | -0.515      | -0.769       | -0.260       | -4.0 | $8 \times 10^{-5}$   | $1.3 \times 10^{-4}$  |

Continued

**Table S6: continued**

|                                   | Model                                                                           | $r^2$ | Adjusted $r^2$ | Model $p$              | Parameter values                   |             |              |              |      |                        |                         |
|-----------------------------------|---------------------------------------------------------------------------------|-------|----------------|------------------------|------------------------------------|-------------|--------------|--------------|------|------------------------|-------------------------|
|                                   |                                                                                 |       |                |                        | Parameter                          | Coefficient | Lower 95% CI | Upper 95% CI | $t$  | $p$                    | $pFDR$                  |
| TMSQ <sup>1</sup> Q <sup>2</sup>  | $Sqrt(TMS_b) \sim Age_b + Q^1 + Age_b * Q^1 + Q^2 + SEQ^1 + Sex + Cohort$       | 0.558 | 0.554          | <2 x 10 <sup>-16</sup> | intercept                          | 4.195       | 4.019        | 4.371        | 46.8 | <2 x 10 <sup>-16</sup> | <2 x 10 <sup>-16</sup>  |
|                                   |                                                                                 |       |                |                        | Age <sub>b</sub>                   | 0.173       | 0.162        | 0.185        | 29.1 | <2 x 10 <sup>-16</sup> | <2 x 10 <sup>-16</sup>  |
|                                   |                                                                                 |       |                |                        | Q <sup>1</sup>                     | 0.715       | 0.650        | 0.779        | 21.8 | <2 x 10 <sup>-16</sup> | <2 x 10 <sup>-16</sup>  |
|                                   |                                                                                 |       |                |                        | Age <sub>b</sub> * Q <sup>1</sup>  | 0.016       | 0.012        | 0.020        | 7.3  | 1 x 10 <sup>-12</sup>  | 2.3 x 10 <sup>-12</sup> |
|                                   |                                                                                 |       |                |                        | Q <sup>2</sup> = 0                 | 2.275       | 1.134        | 3.417        | 3.9  | 1 x 10 <sup>-4+</sup>  | 1.9 x 10 <sup>-4</sup>  |
|                                   |                                                                                 |       |                |                        | Q <sup>2</sup> = 4                 | -0.043      | -0.888       | 0.803        | -0.1 | 0.921 <sup>+</sup>     | 0.921                   |
|                                   |                                                                                 |       |                |                        | SEQ <sup>1</sup>                   | 1.120       | 0.536        | 1.705        | 3.8  | 2 x 10 <sup>-4</sup>   | 2.5 x 10 <sup>-4</sup>  |
|                                   |                                                                                 |       |                |                        | Sex = male                         | -0.027      | -0.251       | 0.197        | -0.2 | 0.813                  | 0.908                   |
|                                   |                                                                                 |       |                |                        | Cohort = TRACK-HD                  | -0.510      | -0.763       | -0.258       | -4.0 | 8 x 10 <sup>-5</sup>   | 1.3 x 10 <sup>-4</sup>  |
| TMSQ <sup>FL</sup> Q <sup>2</sup> | $Sqrt(TMS_b) \sim Age_b + Q^{FL} + Age_b * Q^{FL} + Q^2 + SEQ^1 + Sex + Cohort$ | 0.578 | 0.575          | <2 x 10 <sup>-16</sup> | intercept                          | 4.190       | 4.014        | 4.366        | 46.7 | <2 x 10 <sup>-16</sup> | <2 x 10 <sup>-16</sup>  |
|                                   |                                                                                 |       |                |                        | Age <sub>b</sub>                   | 0.173       | 0.162        | 0.185        | 29.1 | <2 x 10 <sup>-16</sup> | <2 x 10 <sup>-16</sup>  |
|                                   |                                                                                 |       |                |                        | Q <sup>FL</sup>                    | 0.712       | 0.648        | 0.776        | 21.8 | <2 x 10 <sup>-16</sup> | <2 x 10 <sup>-16</sup>  |
|                                   |                                                                                 |       |                |                        | Age <sub>b</sub> * Q <sup>FL</sup> | 0.016       | 0.011        | 0.020        | 7.2  | 1 x 10 <sup>-12</sup>  | 2.7 x 10 <sup>-12</sup> |
|                                   |                                                                                 |       |                |                        | Q <sup>2</sup> = 0                 | 3.702       | 2.545        | 4.860        | 6.3  | <1 x 10 <sup>-5+</sup> | 1.9 x 10 <sup>-5</sup>  |
|                                   |                                                                                 |       |                |                        | Q <sup>2</sup> = 4                 | -0.785      | -1.640       | 0.070        | -1.8 | 0.071 <sup>+</sup>     | 0.084                   |
|                                   |                                                                                 |       |                |                        | SEQ <sup>1</sup>                   | 1.100       | 0.515        | 1.684        | 3.7  | 2 x 10 <sup>-4</sup>   | 3.2 x 10 <sup>-4</sup>  |
|                                   |                                                                                 |       |                |                        | Sex = male                         | -0.026      | -0.249       | 0.198        | -0.2 | 0.823                  | 0.908                   |
|                                   |                                                                                 |       |                |                        | Cohort = TRACK-HD                  | -0.506      | -0.759       | -0.253       | -3.9 | 9 x 10 <sup>-5</sup>   | 1.4 x 10 <sup>-4</sup>  |



**Table S7: Genetic associations between candidate SNPs and the somatic expansion scores of the *HTT* CAG repeat.** SNPs are ordered by decreasing *p*-value of their association with somatic expansion scores in the discovery TRACK-HD cohort. Chr: chromosome. A1: minor allele. N: number of allele observations. MAF: Minor allele frequency.  $\beta$ : regression coefficient. previous  $\beta$ :  $\beta$  obtained in previous genome-wide association studies: a, GeM-HD  $\beta$  (years/minor allele) with motor onset of HD as reported in Bettencourt *et al.*<sup>15</sup> Supplementary table 4; b, GeM-HD  $\beta$  (years/minor allele) with motor onset of HD as reported in GeM-HD<sup>16</sup> table 1; c,  $\beta$  with TRACK-HD progression score.<sup>4</sup> *t*: *t*-statistic *p*: unadjusted *p*-value. *pFDR*: *p*-value adjusted for multiple testing using the Benjamini-Hochberg false discovery rate correction.<sup>34</sup> *z*: overall *z*-statistic. \*Note that in a preliminary analysis using a slightly larger TRACK-HD cohort including four participants with 39 pure CAG repeats ( $Q^1 = 39$ ) and six non-Caucasians, the association between somatic expansion score and rs20579 in *LIG1* was *p* = 0.072, and rs20579 was thus selected for replication in Enroll-HD. Conversely, in the same preliminary analyses rs11061229 had a *p*-value > 0.10 and thus was not selected for replication in Enroll-HD.

| SNP ID      | Chr | Gene                 | A1 | A2 | previous $\beta$   | TRACK-HD |       |         |          |          |             | Enroll-HD |       |         |          |                        |                        | Meta-analysis |                        |                        |  |
|-------------|-----|----------------------|----|----|--------------------|----------|-------|---------|----------|----------|-------------|-----------|-------|---------|----------|------------------------|------------------------|---------------|------------------------|------------------------|--|
|             |     |                      |    |    |                    | N        | MAF   | $\beta$ | <i>t</i> | <i>p</i> | <i>pFDR</i> | N         | MAF   | $\beta$ | <i>t</i> | <i>p</i>               | <i>pFDR</i>            | <i>z</i>      | <i>p</i>               | <i>pFDR</i>            |  |
| rs2140734   | 15  | <i>MTMR10</i>        | G  | T  | 1.4 <sup>b</sup>   | 404      | 0.339 | 0.060   | 2.969    | 0.003    | 0.034       |           |       |         |          |                        |                        |               |                        |                        |  |
| rs3512      | 15  | <i>FAN1</i>          | C  | G  | 1.33 <sup>a</sup>  | 404      | 0.339 | 0.060   | 2.969    | 0.003    | 0.034       | 1062      | 0.326 | 0.050   | 4.019    | 6.7 x 10 <sup>-5</sup> | 4.0 x 10 <sup>-4</sup> | 4.933         | 8.1 x 10 <sup>-7</sup> | 4.8 x 10 <sup>-6</sup> |  |
| rs175080    | 14  | <i>MLH3</i>          | A  | G  | -0.43 <sup>a</sup> | 404      | 0.448 | -0.053  | -2.938   | 0.004    | 0.034       | 1048      | 0.442 | -0.029  | -2.495   | 0.013                  | 0.026                  | -3.644        | 2.7 x 10 <sup>-4</sup> | 8.0 x 10 <sup>-4</sup> |  |
| rs147804330 | 2   | <i>RP11-481J13.1</i> | A  | G  | -1.6 <sup>b</sup>  | 402      | 0.052 | -0.107  | -2.588   | 0.010    | 0.073       | 1026      | 0.065 | 0.003   | 0.110    | 0.912                  | 0.912                  | -1.267        | 0.205                  | 0.246                  |  |
| rs1382539   | 5   | <i>MSH3</i>          | A  | G  | -0.54 <sup>c</sup> | 404      | 0.265 | -0.045  | -2.386   | 0.018    | 0.101       | 1062      | 0.277 | -0.023  | -1.771   | 0.077                  | 0.116                  | -2.746        | 0.006                  | 0.009                  |  |
| rs144287831 | 3   | <i>MLH1</i>          | C  | T  | 0.9 <sup>b</sup>   | 402      | 0.313 | -0.033  | -1.701   | 0.091    | 0.314       |           |       |         |          |                        |                        |               |                        |                        |  |
| rs1799977   | 3   | <i>MLH1</i>          | G  | A  | 0.85 <sup>a</sup>  | 404      | 0.312 | -0.032  | -1.686   | 0.093    | 0.314       | 1062      | 0.304 | -0.034  | -2.630   | 0.009                  | 0.026                  | -3.111        | 0.002                  | 0.004                  |  |
| rs11061229* | 12  | <i>P2 RNA</i>        | C  | G  | -1.7 <sup>b</sup>  | 378      | 0.098 | 0.051   | 1.675    | 0.096    | 0.314       |           |       |         |          |                        |                        |               |                        |                        |  |
| rs72810940  | 2   | -                    | A  | G  | 2.4 <sup>b</sup>   | 398      | 0.023 | -0.099  | -1.609   | 0.109    | 0.314       |           |       |         |          |                        |                        |               |                        |                        |  |
| rs20579*    | 19  | <i>LIG1</i>          | A  | G  | 0.77 <sup>a</sup>  | 404      | 0.151 | -0.042  | -1.597   | 0.112    | 0.314       | 1062      | 0.133 | -0.002  | -0.115   | 0.908                  | 0.912                  | -0.932        | 0.351                  | 0.351                  |  |
| rs72734283  | 14  | <i>MLH3</i>          | G  | A  | 0.86 <sup>a</sup>  | 404      | 0.097 | 0.035   | 1.179    | 0.240    | 0.610       |           |       |         |          |                        |                        |               |                        |                        |  |
| rs1805323   | 7   | <i>PMS2</i>          | T  | G  | -0.95 <sup>a</sup> | 404      | 0.037 | 0.051   | 1.052    | 0.294    | 0.657       |           |       |         |          |                        |                        |               |                        |                        |  |
| rs3735721   | 8   | <i>RRM2B</i>         | G  | A  | -1.53 <sup>a</sup> | 404      | 0.067 | 0.034   | 1.002    | 0.318    | 0.657       |           |       |         |          |                        |                        |               |                        |                        |  |
| rs61752302  | 8   | <i>UBR5</i>          | T  | C  | -1.67 <sup>a</sup> | 404      | 0.025 | -0.057  | -0.960   | 0.338    | 0.657       |           |       |         |          |                        |                        |               |                        |                        |  |
| rs6151792   | 5   | <i>MSH3</i>          | T  | C  | -1.05 <sup>a</sup> | 404      | 0.099 | 0.029   | 0.933    | 0.352    | 0.657       |           |       |         |          |                        |                        |               |                        |                        |  |
| rs115109737 | 5   | <i>MSH3</i>          | A  | G  | -1.29 <sup>a</sup> | 404      | 0.057 | 0.028   | 0.737    | 0.462    | 0.775       |           |       |         |          |                        |                        |               |                        |                        |  |
| rs114136100 | 15  | <i>FAN1</i>          | T  | C  | -5.07 <sup>a</sup> | 404      | 0.010 | 0.066   | 0.717    | 0.475    | 0.775       |           |       |         |          |                        |                        |               |                        |                        |  |
| rs261453    | 13  | -                    | A  | C  | -1.3 <sup>b</sup>  | 404      | 0.087 | 0.021   | 0.679    | 0.498    | 0.775       |           |       |         |          |                        |                        |               |                        |                        |  |
| rs4150407   | 2   | <i>ERCC3</i>         | C  | T  | 0.58 <sup>a</sup>  | 400      | 0.405 | 0.008   | 0.417    | 0.677    | 0.835       |           |       |         |          |                        |                        |               |                        |                        |  |
| rs11133929  | 5   | -                    | C  | T  | 1.5 <sup>b</sup>   | 398      | 0.093 | -0.013  | -0.410   | 0.683    | 0.835       |           |       |         |          |                        |                        |               |                        |                        |  |
| rs1037699   | 8   | <i>RRM2B</i>         | T  | C  | -1.57 <sup>a</sup> | 402      | 0.097 | 0.010   | 0.349    | 0.727    | 0.835       |           |       |         |          |                        |                        |               |                        |                        |  |
| rs1037700   | 8   | <i>RRM2B</i>         | C  | G  | -1.54 <sup>a</sup> | 402      | 0.097 | 0.010   | 0.349    | 0.727    | 0.835       |           |       |         |          |                        |                        |               |                        |                        |  |
| rs5893603   | 8   | <i>RRM2B</i>         | CG | C  | -1.55 <sup>a</sup> | 402      | 0.097 | 0.010   | 0.349    | 0.727    | 0.835       |           |       |         |          |                        |                        |               |                        |                        |  |
| rs5742933   | 2   | <i>PMS1</i>          | C  | G  | -0.70 <sup>a</sup> | 404      | 0.183 | 0.008   | 0.332    | 0.740    | 0.835       |           |       |         |          |                        |                        |               |                        |                        |  |
| rs12531179  | 7   | <i>PMS2</i>          | T  | C  | 0.94 <sup>a</sup>  | 400      | 0.150 | 0.007   | 0.278    | 0.781    | 0.835       |           |       |         |          |                        |                        |               |                        |                        |  |
| rs16869352  | 8   | <i>UBR5</i>          | C  | T  | -1.53 <sup>a</sup> | 404      | 0.089 | 0.008   | 0.258    | 0.797    | 0.835       |           |       |         |          |                        |                        |               |                        |                        |  |
| rs1800937   | 2   | <i>MSH6</i>          | T  | C  | 0.82 <sup>a</sup>  | 404      | 0.079 | -0.007  | -0.228   | 0.820    | 0.835       |           |       |         |          |                        |                        |               |                        |                        |  |
| rs71636247  | 5   | <i>MSH3</i>          | G  | A  | -1.40 <sup>a</sup> | 390      | 0.031 | -0.011  | -0.209   | 0.835    | 0.835       |           |       |         |          |                        |                        |               |                        |                        |  |

**Tables S8A-D: Human tissue-specific expression quantitative trait data for DNA repair gene SNPs.** For each SNP yielding an association with somatic expansion scores, we queried the Gene-Tissue Expression database (<https://gtexportal.org/>) to identify potential human eQTL effects. For each SNP we show the normalised effect size on gene expression, the raw  $p$ -value for an association between the SNP and tissue-specific gene expression levels, and the false discovery rate corrected  $p$ -value ( $pFDR$ ).<sup>34</sup> Tissues with significantly decreased gene expression associated with the minor allele are indicated in red, and tissues with significantly increased gene expression associated with the minor allele are indicated in green.

**Table S8A: *MSH3***

| Gene Symbol                               | Gencode Id             | Variant Id         | SNP         |
|-------------------------------------------|------------------------|--------------------|-------------|
| <i>MSH3</i>                               | ENSG00000113318.9      | 5_79952154_G_A_b37 | rs1382539   |
| Tissue                                    | Normalised effect size | $p$ -value         | $pFDR$      |
| Thyroid                                   | -0.49                  | 1.20E-28           | 6.00E-27    |
| Skin - Sun Exposed (Lower leg)            | -0.41                  | 9.90E-25           | 2.48E-23    |
| Artery - Tibial                           | -0.49                  | 2.70E-24           | 4.50E-23    |
| Skin - Not Sun Exposed (Suprapubic)       | -0.45                  | 4.40E-24           | 5.50E-23    |
| Adipose - Subcutaneous                    | -0.39                  | 8.30E-21           | 6.14E-20    |
| Nerve - Tibial                            | -0.48                  | 8.60E-21           | 6.14E-20    |
| Nerve - Tibial                            | -0.48                  | 8.60E-21           | 6.14E-20    |
| Whole Blood                               | -0.41                  | 3.00E-19           | 1.88E-18    |
| Heart - Atrial Appendage                  | -0.41                  | 1.20E-14           | 6.67E-14    |
| Artery - Aorta                            | -0.51                  | 2.80E-14           | 1.40E-13    |
| Adipose - Visceral (Omentum)              | -0.33                  | 2.10E-11           | 9.55E-11    |
| Pancreas                                  | -0.44                  | 7.60E-11           | 3.17E-10    |
| Adrenal Gland                             | -0.44                  | 4.90E-09           | 1.82E-08    |
| Colon - Sigmoid                           | -0.36                  | 5.10E-09           | 1.82E-08    |
| Breast - Mammary Tissue                   | -0.36                  | 3.40E-08           | 1.13E-07    |
| Colon - Transverse                        | -0.31                  | 8.60E-08           | 2.69E-07    |
| Pituitary                                 | -0.42                  | 1.50E-07           | 4.41E-07    |
| Esophagus - Muscularis                    | -0.26                  | 4.20E-07           | 1.17E-06    |
| Esophagus - Mucosa                        | -0.19                  | 0.0000029          | 7.63E-06    |
| Artery - Coronary                         | -0.33                  | 0.000016           | 4.00E-05    |
| Stomach                                   | -0.3                   | 0.000035           | 8.33E-05    |
| Brain - Nucleus accumbens (basal ganglia) | -0.27                  | 0.000075           | 0.000170455 |
| Brain - Cortex                            | -0.37                  | 0.00014            | 0.000304348 |
| Heart - Left Ventricle                    | -0.14                  | 0.00015            | 0.0003125   |
| Lung                                      | -0.16                  | 0.00023            | 0.00046     |
| Brain - Amygdala                          | -0.48                  | 3.50E-04           | 0.000648148 |
| Brain - Amygdala                          | -0.48                  | 0.00035            | 0.000648148 |
| Brain - Caudate (basal ganglia)           | -0.25                  | 4.20E-04           | 0.000724138 |
| Brain - Caudate (basal ganglia)           | -0.25                  | 0.00042            | 0.000724138 |
| Brain - Anterior cingulate cortex (BA24)  | -0.28                  | 7.00E-04           | 0.001129032 |
| Brain - Anterior cingulate cortex (BA24)  | -0.28                  | 0.0007             | 0.001129032 |
| Vagina                                    | -0.27                  | 0.00078            | 0.00121875  |
| Ovary                                     | -0.32                  | 0.0014             | 0.002121212 |
| Brain - Hippocampus                       | -0.3                   | 0.0019             | 0.002794118 |
| Brain - Putamen (basal ganglia)           | -0.28                  | 0.0032             | 0.004571429 |
| Prostate                                  | -0.24                  | 0.0053             | 0.007361111 |
| Minor Salivary Gland                      | -0.3                   | 0.0075             | 0.01013514  |
| Brain - Spinal cord (cervical c-1)        | -0.39                  | 0.011              | 0.01447368  |
| Brain - Hypothalamus                      | -0.21                  | 0.021              | 0.02692308  |
| Liver                                     | 0.16                   | 0.024              | 0.03        |
| Uterus                                    | -0.24                  | 0.028              | 0.03414634  |
| Brain - Substantia nigra                  | -0.24                  | 0.06               | 0.07142857  |
| Brain - Cerebellum                        | -0.14                  | 0.08               | 0.09302326  |
| Spleen                                    | -0.16                  | 0.085              | 0.09659091  |
| Muscle - Skeletal                         | -0.058                 | 0.09               | 0.1         |
| Brain - Frontal Cortex (BA9)              | -0.13                  | 0.14               | 0.1521739   |
| Brain - Cerebellar Hemisphere             | -0.11                  | 1.70E-01           | 0.1770833   |
| Brain - Cerebellar Hemisphere             | -0.11                  | 0.17               | 0.1770833   |
| Small Intestine - Terminal Ileum          | -0.084                 | 0.44               | 0.4489796   |
| Testis                                    | 0.037                  | 0.55               | 0.55        |

**Table S8B: *MLH1***

| Gene Symbol                               | Gencode Id             | Variant Id         | SNP       |
|-------------------------------------------|------------------------|--------------------|-----------|
| <i>MLH1</i>                               | ENSG00000076242.10     | 3 37053568 A G b37 | rs1799977 |
| Tissue                                    | Normalised effect size | p-value            | pFDR      |
| Muscle - Skeletal                         | 0.18                   | 2.90E-09           | 1.45E-07  |
| Testis                                    | 0.11                   | 0.035              | 0.6956522 |
| Adipose - Visceral (Omentum)              | -0.096                 | 0.043              | 0.6956522 |
| Brain - Spinal cord (cervical c-1)        | 0.18                   | 0.063              | 0.6956522 |
| Pancreas                                  | -0.12                  | 0.076              | 0.6956522 |
| Uterus                                    | -0.21                  | 0.088              | 0.6956522 |
| Artery - Tibial                           | 0.054                  | 0.11               | 0.6956522 |
| Esophagus - Muscularis                    | 0.055                  | 0.14               | 0.6956522 |
| Minor Salivary Gland                      | 0.11                   | 0.16               | 0.6956522 |
| Heart - Left Ventricle                    | -0.044                 | 0.18               | 0.6956522 |
| Prostate                                  | 0.091                  | 0.19               | 0.6956522 |
| Whole Blood                               | -0.043                 | 0.19               | 0.6956522 |
| Thyroid                                   | 0.041                  | 0.2                | 0.6956522 |
| Ovary                                     | -0.13                  | 0.21               | 0.6956522 |
| Colon - Sigmoid                           | 0.062                  | 0.24               | 0.6956522 |
| Brain - Anterior cingulate cortex (BA24)  | -0.13                  | 0.25               | 0.6956522 |
| Brain - Anterior cingulate cortex (BA24)  | -0.13                  | 0.25               | 0.6956522 |
| Artery - Aorta                            | 0.059                  | 0.27               | 0.6956522 |
| Vagina                                    | -0.1                   | 0.27               | 0.6956522 |
| Brain - Caudate (basal ganglia)           | -0.082                 | 0.3                | 0.6956522 |
| Brain - Caudate (basal ganglia)           | -0.082                 | 0.3                | 0.6956522 |
| Brain - Hypothalamus                      | -0.09                  | 0.31               | 0.6956522 |
| Brain - Substantia nigra                  | 0.11                   | 0.32               | 0.6956522 |
| Brain - Hippocampus                       | -0.078                 | 0.38               | 0.7916667 |
| Lung                                      | -0.026                 | 0.41               | 0.8103448 |
| Adipose - Subcutaneous                    | -0.034                 | 0.44               | 0.8103448 |
| Spleen                                    | -0.05                  | 0.44               | 0.8103448 |
| Liver                                     | -0.042                 | 0.46               | 0.8103448 |
| Small Intestine - Terminal Ileum          | -0.044                 | 0.47               | 0.8103448 |
| Brain - Frontal Cortex (BA9)              | -0.066                 | 0.56               | 0.9       |
| Brain - Cerebellar Hemisphere             | 0.04                   | 0.6                | 0.9       |
| Brain - Cerebellar Hemisphere             | 0.04                   | 0.6                | 0.9       |
| Brain - Nucleus accumbens (basal ganglia) | -0.047                 | 0.66               | 0.9       |
| Artery - Coronary                         | 0.033                  | 0.67               | 0.9       |
| Pituitary                                 | 0.027                  | 0.68               | 0.9       |
| Adrenal Gland                             | 0.019                  | 0.7                | 0.9       |
| Stomach                                   | 0.022                  | 0.7                | 0.9       |
| Nerve - Tibial                            | -0.017                 | 0.72               | 0.9       |
| Colon - Transverse                        | -0.014                 | 0.72               | 0.9       |
| Nerve - Tibial                            | -0.017                 | 0.72               | 0.9       |
| Skin - Sun Exposed (Lower leg)            | -0.011                 | 0.74               | 0.902439  |
| Brain - Putamen (basal ganglia)           | -0.033                 | 0.76               | 0.9042553 |
| Brain - Cortex                            | 0.02                   | 0.82               | 0.9042553 |
| Esophagus - Mucosa                        | 0.0074                 | 0.82               | 0.9042553 |
| Heart - Atrial Appendage                  | -0.0078                | 0.84               | 0.9042553 |
| Brain - Amygdala                          | 0.023                  | 0.85               | 0.9042553 |
| Brain - Amygdala                          | 0.023                  | 0.85               | 0.9042553 |
| Skin - Not Sun Exposed (Suprapubic)       | -0.0058                | 0.88               | 0.9166667 |
| Brain - Cerebellum                        | 0.0026                 | 0.97               | 0.98      |
| Breast - Mammary Tissue                   | 0.0013                 | 0.98               | 0.98      |

**Table S8C: *MLH3***

| Gene Symbol                               | Gencode Id             | Variant Id          | SNP               |
|-------------------------------------------|------------------------|---------------------|-------------------|
| <i>MLH3</i>                               | ENSG00000119684.11     | 14_75513828_G_A_b37 | rs175080          |
| Tissue                                    | Normalised effect size | p-value             | pFDR              |
| Whole Blood                               | -0.21                  | 9.60E-07            | <b>4.80E-05</b>   |
| Nerve - Tibial                            | 0.19                   | 0.0000075           | <b>0.000125</b>   |
| Nerve - Tibial                            | 0.19                   | 0.0000075           | <b>0.000125</b>   |
| Brain - Hippocampus                       | 0.21                   | 0.00016             | <b>0.002</b>      |
| Testis                                    | -0.15                  | 0.00022             | <b>0.0022</b>     |
| Muscle - Skeletal                         | -0.13                  | 0.00045             | <b>0.00375</b>    |
| Esophagus - Mucosa                        | -0.10                  | 0.0017              | <b>0.01214286</b> |
| Colon - Transverse                        | 0.15                   | 0.0037              | <b>0.023125</b>   |
| Brain - Nucleus accumbens (basal ganglia) | -0.18                  | 0.0097              | 0.05388889        |
| Pituitary                                 | 0.12                   | 0.011               | 0.055             |
| Skin - Sun Exposed (Lower leg)            | 0.076                  | 0.017               | 0.07727273        |
| Adipose - Visceral (Omentum)              | -0.087                 | 0.028               | 0.1166667         |
| Heart - Left Ventricle                    | -0.099                 | 0.033               | 0.1269231         |
| Breast - Mammary Tissue                   | 0.10                   | 0.053               | 0.18              |
| Colon - Sigmoid                           | 0.14                   | 0.054               | 0.18              |
| Stomach                                   | -0.072                 | 0.073               | 0.228125          |
| Artery - Aorta                            | -0.076                 | 0.083               | 0.2441176         |
| Artery - Tibial                           | 0.062                  | 0.096               | 0.2666667         |
| Liver                                     | -0.092                 | 0.17                | 0.4473684         |
| Small Intestine - Terminal Ileum          | 0.094                  | 0.19                | 0.475             |
| Vagina                                    | 0.088                  | 0.2                 | 0.4761905         |
| Brain - Frontal Cortex (BA9)              | -0.096                 | 0.22                | 0.5               |
| Thyroid                                   | 0.042                  | 0.24                | 0.5               |
| Brain - Cerebellar Hemisphere             | 0.073                  | 0.25                | 0.5               |
| Brain - Cerebellar Hemisphere             | 0.073                  | 0.25                | 0.5               |
| Skin - Not Sun Exposed (Suprapubic)       | -0.037                 | 0.3                 | 0.5740741         |
| Spleen                                    | -0.078                 | 0.31                | 0.5740741         |
| Esophagus - Muscularis                    | -0.042                 | 0.36                | 0.6282051         |
| Brain - Cortex                            | -0.065                 | 0.37                | 0.6282051         |
| Ovary                                     | -0.094                 | 0.38                | 0.6282051         |
| Uterus                                    | -0.093                 | 0.41                | 0.6282051         |
| Brain - Caudate (basal ganglia)           | -0.055                 | 0.44                | 0.6282051         |
| Brain - Caudate (basal ganglia)           | -0.055                 | 0.44                | 0.6282051         |
| Pancreas                                  | -0.044                 | 0.46                | 0.6282051         |
| Brain - Anterior cingulate cortex (BA24)  | 0.054                  | 0.47                | 0.6282051         |
| Brain - Anterior cingulate cortex (BA24)  | 0.054                  | 0.47                | 0.6282051         |
| Adrenal Gland                             | -0.035                 | 0.48                | 0.6282051         |
| Brain - Amygdala                          | 0.053                  | 0.49                | 0.6282051         |
| Brain - Amygdala                          | 0.053                  | 0.49                | 0.6282051         |
| Brain - Substantia nigra                  | -0.048                 | 0.54                | 0.6707317         |
| Lung                                      | 0.019                  | 0.55                | 0.6707317         |
| Brain - Cerebellum                        | 0.025                  | 0.57                | 0.6785714         |
| Brain - Hypothalamus                      | -0.04                  | 0.6                 | 0.6976744         |
| Brain - Spinal cord (cervical c-1)        | 0.03                   | 0.66                | 0.75              |
| Brain - Putamen (basal ganglia)           | -0.029                 | 0.72                | 0.7826087         |
| Minor Salivary Gland                      | -0.031                 | 0.72                | 0.7826087         |
| Heart - Atrial Appendage                  | -0.01                  | 0.85                | 0.9042553         |
| Artery - Coronary                         | -0.0081                | 0.92                | 0.9583333         |
| Adipose - Subcutaneous                    | 0.0031                 | 0.94                | 0.9591837         |
| Prostate                                  | 0.0014                 | 0.99                | 0.99              |

**Table S8D: *FANI***

| Gene Symbol                               | Gencode Id             | Variant Id          | SNP        |
|-------------------------------------------|------------------------|---------------------|------------|
| <i>FANI</i>                               | ENSG00000198690.5      | 15_31235005_G_C_b37 | rs3512     |
| Tissue                                    | Normalised effect size | p-value             | pFDR       |
| Brain - Cortex                            | 0.35                   | 4.20E-07            | 1.89E-05   |
| Adipose - Subcutaneous                    | 0.19                   | 0.0000025           | 5.63E-05   |
| Brain - Anterior cingulate cortex (BA24)  | 0.25                   | 0.000088            | 0.00132    |
| Skin - Sun Exposed (Lower leg)            | 0.1                    | 0.00021             | 0.0023625  |
| Brain - Nucleus accumbens (basal ganglia) | 0.16                   | 0.0016              | 0.0135     |
| Whole Blood                               | 0.13                   | 0.0018              | 0.0135     |
| Heart - Left Ventricle                    | -0.087                 | 0.0039              | 0.02507143 |
| Brain - Frontal Cortex (BA9)              | 0.17                   | 0.0085              | 0.0478125  |
| Brain - Hippocampus                       | 0.15                   | 0.011               | 0.055      |
| Breast - Mammary Tissue                   | 0.12                   | 0.019               | 0.08181818 |
| Ovary                                     | -0.22                  | 0.02                | 0.08181818 |
| Brain - Putamen (basal ganglia)           | 0.13                   | 0.027               | 0.1003846  |
| Pancreas                                  | -0.13                  | 0.029               | 0.1003846  |
| Artery - Tibial                           | 0.083                  | 0.044               | 0.1414286  |
| Heart - Atrial Appendage                  | -0.08                  | 0.065               | 0.195      |
| Lung                                      | 0.067                  | 0.071               | 0.1996875  |
| Brain - Substantia nigra                  | 0.13                   | 0.092               | 0.2435294  |
| Brain - Spinal cord (cervical c-1)        | 0.11                   | 0.12                | 0.3        |
| Pituitary                                 | -0.083                 | 0.13                | 0.3078947  |
| Artery - Coronary                         | 0.1                    | 0.15                | 0.3375     |
| Liver                                     | -0.069                 | 0.18                | 0.3857143  |
| Esophagus - Mucosa                        | -0.038                 | 0.23                | 0.4704545  |
| Brain - Amygdala                          | -0.085                 | 0.29                | 0.5673913  |
| Brain - Cerebellum                        | 0.076                  | 0.31                | 0.58125    |
| Testis                                    | -0.047                 | 0.35                | 0.63       |
| Nerve - Tibial                            | 0.033                  | 0.37                | 0.6362069  |
| Colon - Transverse                        | -0.032                 | 0.39                | 0.6362069  |
| Brain - Cerebellar Hemisphere             | 0.046                  | 0.41                | 0.6362069  |
| Brain - Hypothalamus                      | 0.043                  | 0.41                | 0.6362069  |
| Spleen                                    | 0.048                  | 0.44                | 0.6387097  |
| Stomach                                   | -0.035                 | 0.44                | 0.6387097  |
| Skin - Not Sun Exposed (Suprapubic)       | 0.023                  | 0.48                | 0.6545455  |
| Uterus                                    | 0.08                   | 0.48                | 0.6545455  |
| Thyroid                                   | 0.025                  | 0.52                | 0.6875     |
| Esophagus - Muscularis                    | 0.019                  | 0.55                | 0.6875     |
| Small Intestine - Terminal Ileum          | -0.04                  | 0.55                | 0.6875     |
| Colon - Sigmoid                           | -0.017                 | 0.64                | 0.7783784  |
| Muscle - Skeletal                         | -0.013                 | 0.66                | 0.7815789  |
| Minor Salivary Gland                      | -0.034                 | 0.68                | 0.7846154  |
| Brain - Caudate (basal ganglia)           | 0.021                  | 0.74                | 0.8325     |
| Artery - Aorta                            | 0.014                  | 0.79                | 0.8571429  |
| Adrenal Gland                             | 0.013                  | 0.8                 | 0.8571429  |
| Adipose - Visceral (Omentum)              | 0.0072                 | 0.85                | 0.8895349  |
| Prostate                                  | 0.01                   | 0.91                | 0.9306818  |
| Vagina                                    | -0.0022                | 0.98                | 0.98       |

Supplementary figures

**Figure S1: Comparison of pure CAG repeat lengths determined by deep-sequencing ( $Q^1$ ) and estimated by fragment-length analyses ( $Q^{FL}$ ).** **A)** Scatter plot of pure CAG length determined via direct sequencing versus estimated CAG length determined via standard fragment-length analysis. Fragment-length analysis consistently mis-sized all disease-associated atypical alleles ( $Q^1 \geq 40$ ) with the CAACAG deletion ( $Q^2 = 0$ ,  $n = 7$ ) as two repeats smaller than they actually are. Surprisingly, fragment-length analysis consistently mis-sized all atypical alleles with the CAACAG duplication ( $Q^2 = 4$ ,  $n = 13$ ) as only one repeat larger than they actually are, rather than the expected two repeat difference. Similarly, fragment-length analysis unexpectedly correctly sized the one atypical allele with the  $(CAA)_2(CAG)_1$  complement of glutamine encoding codons downstream of the pure CAG tract ( $Q^2 = 3$ ), rather than the expected one repeat difference. Only one typical allele ( $Q^2 = 2$ ) was differentially sized by fragment-length analysis as 49 rather than 48 CAG repeats. Symbol size is proportional to the number of observations as shown. **B) Location of PCR primers used for fragment-length analysis.** The position of the PCR primers used in the standard diagnostic test<sup>7</sup> are indicated. Note that the reverse primer, HD3, spans the polymorphic region between the pure CAG and CCG tracts. **C/D/E/F)** Schematic representation of the common *HTT* CAG structures (top) and the estimates of CAG length derived by standard fragment-length analysis ( $Q^{FL}$ , lower) for a typical allele ( $Q^2 = 2$ ) (C), an atypical allele with deletion of the CAACAG cassette ( $Q^2 = 0$ ) (D), an atypical allele with the  $(CAA)_2(CAG)_1$  complement of glutamine encoding codons downstream of the pure CAG tract ( $Q^2 = 3$ ) (E), and an atypical allele with duplication of the CAACAG cassette ( $Q^2 = 4$ ) (F). Note that fragment-length analysis under-estimates the pure CAG length ( $Q^1$ ) by two repeats when the CAACAG cassette is deleted ( $Q^1 = Q^{FL} + 2$ , when  $Q^2 = 0$ ) (D). Note also, that fragment-length analysis unexpectedly correctly-estimated the pure CAG length ( $Q^1$ ) for an atypical allele with the  $(CAA)_2(CAG)_1$  complement of glutamine encoding codons downstream of the pure CAG tract ( $Q^2 = 3$ ) (E), and that fragment-length analysis over-estimates the pure CAG length ( $Q^1$ ) by one repeat when the CAACAG cassette is duplicated ( $Q^1 = Q^{FL} - 1$ , when  $Q^2 = 4$ ) (F), presumably due to mis-priming of HD3.

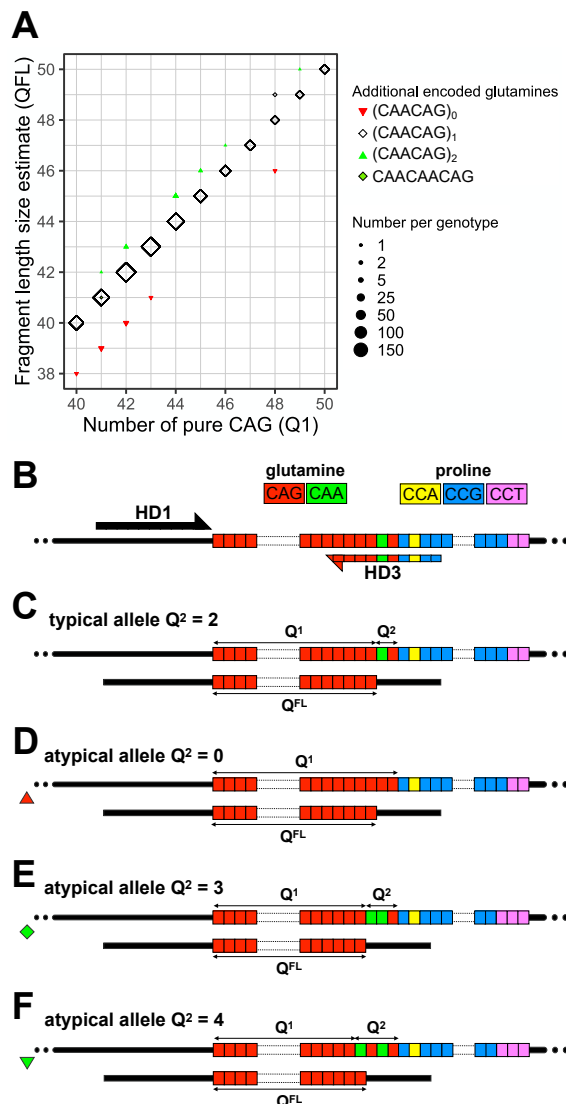



**Figure S2: Read depth distributions for CAG repeat length support a somatic origin for repeat length gains.** The graphs show the proportion of DNA sequence reads mapped to each CAG repeat length reference for progenitor alleles of different lengths derived from sequencing of PCR amplification of either single molecules or bulk blood DNA samples (20 ng) from either younger or older carriers of disease-associated alleles. Note that all non-progenitor ( $Q^1$ ) reads for the single-molecule amplified products must represent PCR slippage errors and that these are almost exclusively biased toward loss of repeats and that repeat length gains are virtually absent (see also figure S3). Note further that frequent repeat length gains are observed in the bulk DNA analyses (see also figure S3), and that these are much more frequent in the older individuals.

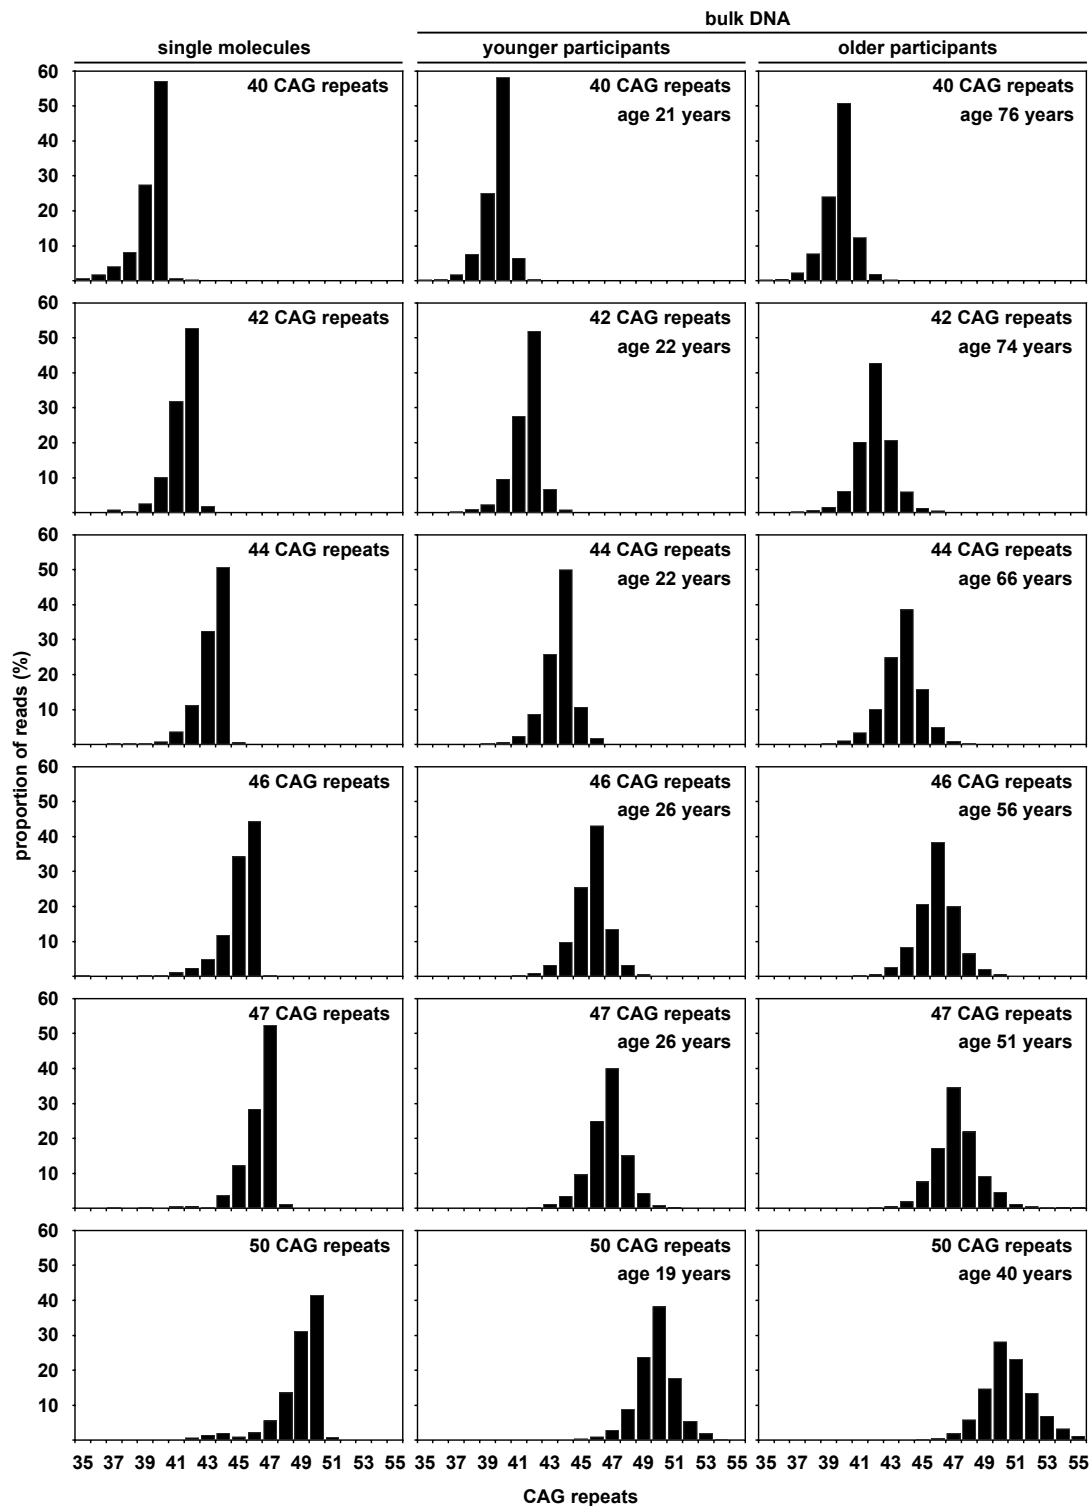

**Figure S3: Read depth distributions for CAG repeat length support a somatic origin for repeat length gains.**  
**A) The proportion of DNA sequence reads derived from larger alleles is much higher in bulk DNA than in alleles amplified from single molecules.** The graph shows the proportion of reads mapped to CAG repeat length references greater ( $n + 1$ ) than the progenitor alleles ( $n = Q^1$ ) of different lengths derived from PCR amplification of either single molecules (crosses) or bulk blood DNA samples (open diamonds). Note that the fraction of expansions observed in bulk DNA sample is much greater than that caused by PCR slippage in single molecules. **B) The proportion of DNA sequence reads derived from smaller alleles is similar in single molecules and in bulk DNA.** The graph shows the proportion of reads mapped to CAG repeat length references smaller ( $n - 1$ ) than the progenitor alleles ( $n = Q^1$ ) of different lengths derived from PCR amplification of either single molecules (crosses) or bulk blood DNA samples (open diamonds). Note that the fraction of contractions observed in bulk DNA samples is similar to that caused by PCR slippage in single molecules. **C) Interpretation of non-progenitor sequence reads in bulk DNA analyses.** The data presented in figures S2 and S3A and B support a model in which the vast majority of reads shorter than the progenitor ( $n = Q^1$ ) are PCR Taq polymerase slippage errors ( $n-1, n-2$  etc.) and that the vast majority of reads longer than the progenitor allele represent genuine somatic expansions ( $n+1, n+2$  etc.).

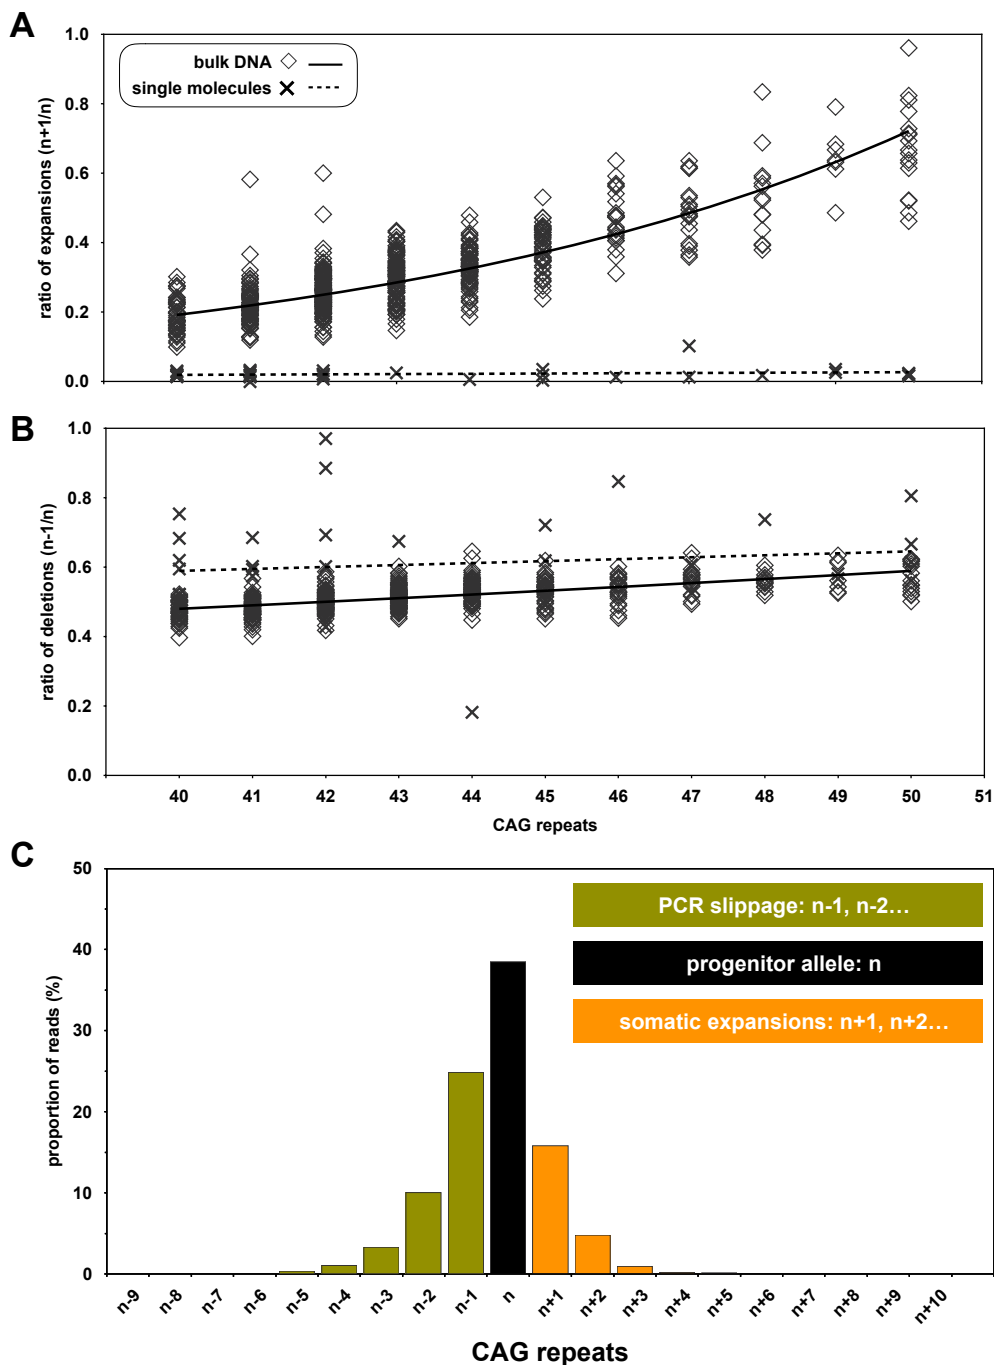

**Figure S4: Relative toxicities for alleles dependent either on total encoded glutamine or pure CAG length.** Alleles with the same number of total encoded glutamines ( $Q^T$ ) (upper), but differing in the number of CAACAG cassettes ( $Q^2$ ), have a degree of somatic expansion and disease severity that is best reflected by the number of pure CAG repeats ( $Q^1$ ) *i.e.* for the same number of encoded glutamines, more somatic expansions associate with worse disease outcomes. Alleles with the same number of pure CAG repeats ( $Q^1$ ) (lower), but differing in the number of CAACAG cassettes ( $Q^2$ ), have a similar degree of somatic expansion. Alleles with the same number of pure CAG repeats ( $Q^1$ ) (lower), but with more CAACAG cassettes ( $Q^2$ ) should generate proteins with longer toxic polyglutamine (pQ) tracts. Longer toxic polyglutamine tracts might be expected to result in worse outcomes. However, our data suggest that after correcting for pure CAG length ( $Q^1$ ), people with fewer total encoded glutamines have worse outcomes. Repeat codons are depicted: CAG glutamine codons as red boxes; and, CAA glutamine codons as green boxes. The direction of the arrows and brighter red indicate: more somatic expansions; worse outcomes; and, greater expected polyglutamine (polyQ) toxicity.

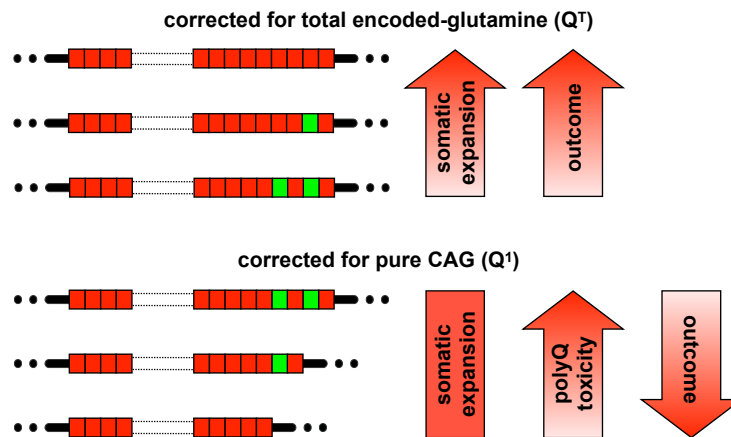

**Figure S5: Association of pure CAG repeat length ( $Q^1$ ), fragment length estimated CAG ( $Q^{FL}$ ) and total encoded-glutamine length ( $Q^T$ ) with the number of additional glutamine codons ( $Q^2$ ) on disease-associated chromosomes.** The histograms show the relationship between pure CAG repeat length ( $Q^1$ , left), fragment length estimated CAG ( $Q^{FL}$ , middle) and total encoded-glutamine length ( $Q^T$ , right), with the number of downstream glutamine codons ( $Q^2$ ) on disease-associated chromosomes ( $40 \leq Q^1 \leq 50$ ) in the TRACK-HD and Enroll-HD cohorts. A linear regression analysis between pure CAG repeat length ( $Q^1$ ) and the number of additional glutamine codons ( $Q^2$ ) revealed:  $r = 0.05$ , adjusted  $r^2 = 0.001$ ,  $p = 0.17$ . A linear regression analysis between pure CAG repeat length ( $Q^{FL}$ ) and the number of additional glutamine codons ( $Q^2$ ) revealed:  $r = 0.14$ , adjusted  $r^2 = 0.019$ ,  $p = 8.8 \times 10^{-5}$ . A linear regression analysis between total encoded-glutamine length ( $Q^T$ ) and the number of downstream glutamine codons ( $Q^2$ ) revealed:  $r = 0.19$ , adjusted  $r^2 = 0.034$ ,  $p = 2.3 \times 10^{-7}$ .

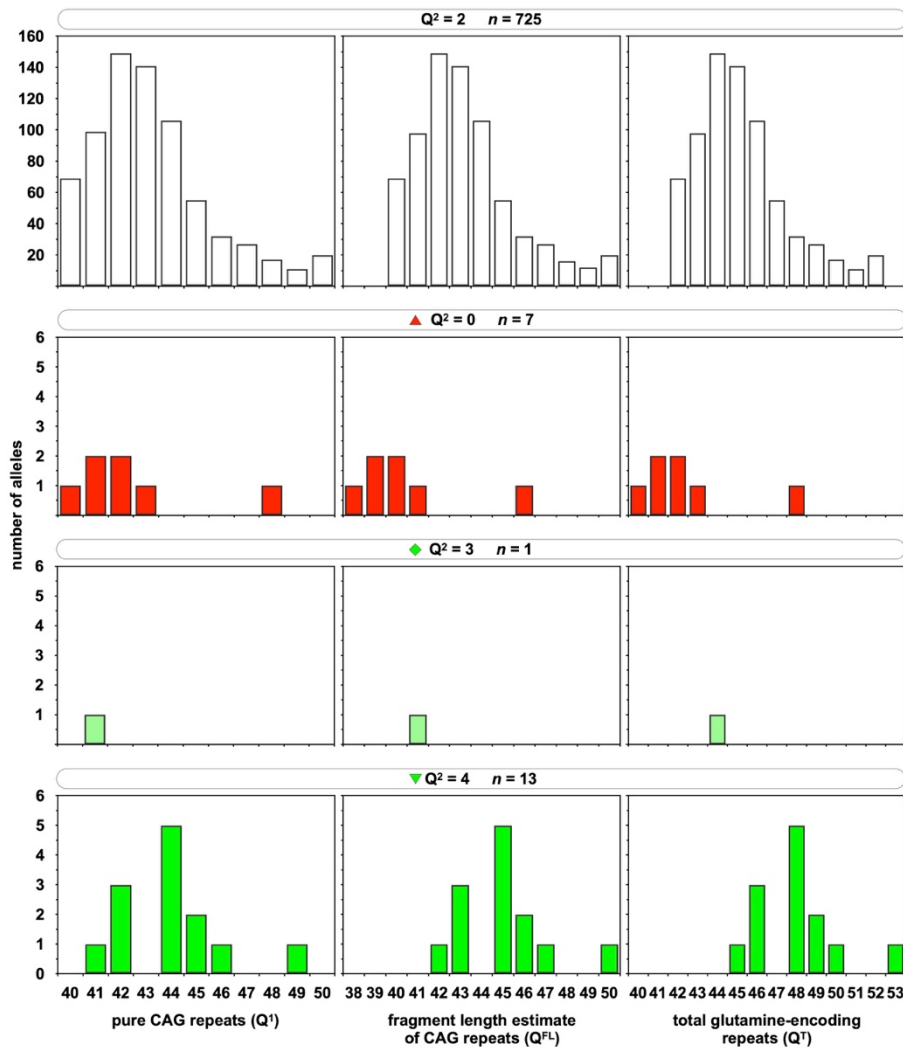

**Figure S6: Blood and brain dynamics of CAG repeats dependent on CAG structures and SNP genotypes.**

**A) Blood and brain dynamics of CAG repeats dependent on CAG structures.** We have shown that alleles with the same number of total glutamines ( $Q^T$ ), but with fewer CAACAG cassettes ( $Q^2$ ) expand more rapidly with time in blood DNA. We predict that expansions in brain are larger, but mirror the pattern observed in blood DNA and that this difference in mutational dynamics explains variable disease outcomes *i.e.* alleles with the same number of total glutamines ( $Q^T$ ), but with fewer CAACAG cassettes ( $Q^2$ ), expand more rapidly with time in brain causing worse outcomes. **B) Blood and brain dynamics of CAG repeats dependent on *MSH3* rs1382539 SNP genotypes.**

Individuals homozygous for the rs1382539 SNP G allele have more somatic expansions in blood DNA. rs1382539 is an expression quantitative trait locus (eQTL) and the G allele is associated with higher gene expression in multiple tissues, including vulnerable regions of the HD brain such as the caudate and cortex (table S8A, appendix). Mouse model data reveal *Msh3* is essential to drive somatic CAG repeat expansions.<sup>35-37</sup> We thus hypothesise that the rs1382539 G allele drives higher *MSH3* expression in blood stem cells and that resultant higher enzymatic activity increases the rate of somatic expansion in blood DNA, and that this effect is mirrored in critical brain regions leading to worse HD outcomes.

**C) Blood and brain dynamics of CAG repeats dependent on *MLH3* rs175080 SNP genotypes.** Individuals homozygous for the rs175080 SNP A allele have fewer somatic expansions in blood DNA. rs175080 is an eQTL with the A allele associated with lower gene expression in some tissues (*e.g.* whole blood), and higher gene expression in other tissues (*e.g.* hippocampus) (table S8C, appendix). Mouse model data reveal *Mlh3* is essential to drive somatic CAG repeat expansions.<sup>38</sup> We thus hypothesise that the rs175080 A allele drives lower *MLH3* expression in blood stem cells and that resultant lower enzymatic activity decreases the rate of somatic expansion in blood DNA. We hypothesise that the gene expression effects are reversed in critical brain regions leading to worse HD outcomes with the rs175080 A allele. Repeat codons are depicted: CAG glutamine codons as red boxes; and, CAA glutamine codons as green boxes. The direction of the arrows and brighter red indicate: worse outcomes; and, higher gene expression.

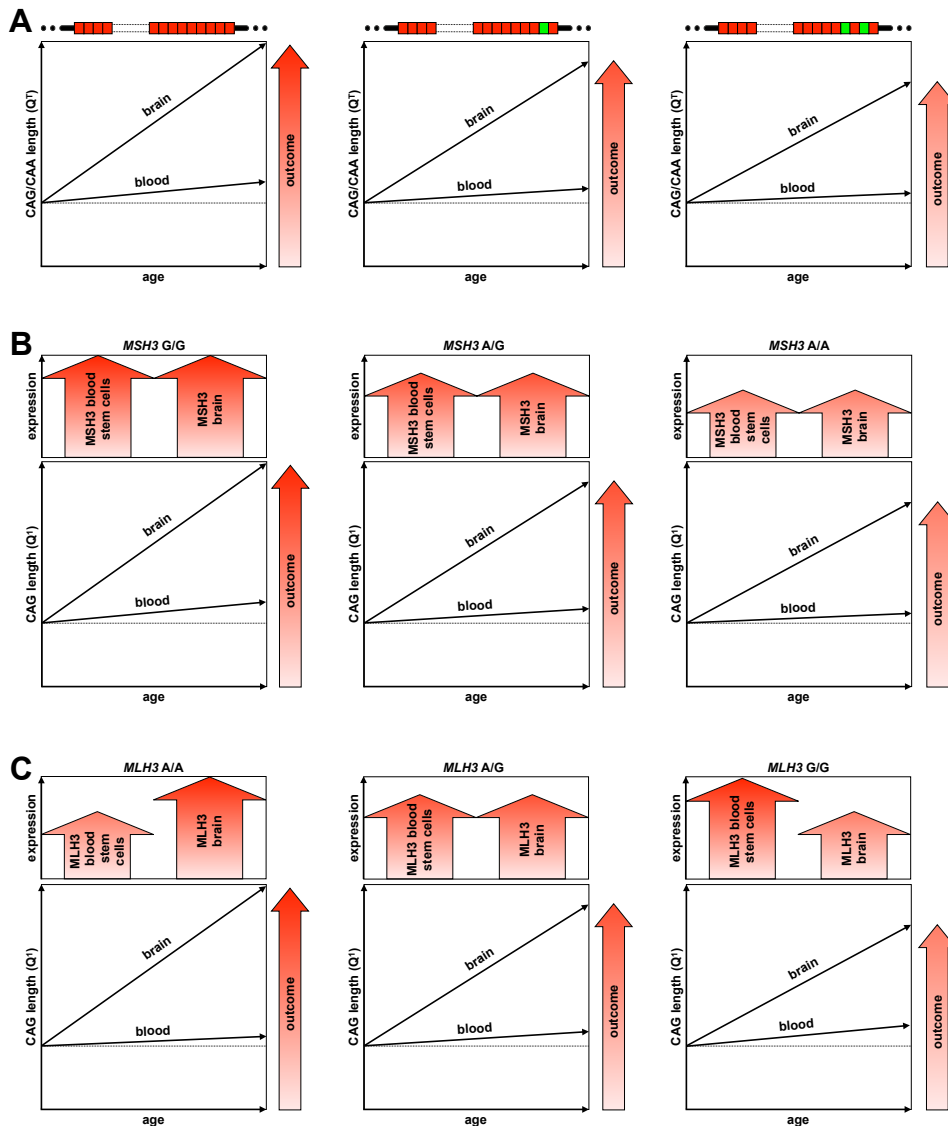

#### IV. References for supplementary material

- 1 Tabrizi SJ, Langbehn DR, Leavitt BR, et al. Biological and clinical manifestations of Huntington's disease in the longitudinal TRACK-HD study: cross-sectional analysis of baseline data. *Lancet Neurol* 2009; **8**: 791–801.
- 2 Huntington Study Group. Unified Huntington's Disease Rating Scale: reliability and consistency. *Mov Disord* 1996; **11**: 136–42.
- 3 Penney JB, Jr., Vonsattel JP, MacDonald ME, Gusella JF, Myers RH. CAG repeat number governs the development rate of pathology in Huntington's disease. *Ann Neurol* 1997; **41**: 689–92.
- 4 Hensman Moss DJ, Pardini AF, Langbehn D, et al. Identification of genetic variants associated with Huntington's disease progression: a genome-wide association study. *Lancet Neurol* 2017; **16**: 701–11.
- 5 Perlis RH, Smoller JW, Mysore J, et al. Prevalence of incompletely penetrant Huntington's disease alleles among individuals with major depressive disorder. *Am J Psychiatry* 2010; **167**: 574–79.
- 6 Warner JP, Barron LH, Brock DJ. A new polymerase chain reaction (PCR) assay for the trinucleotide repeat that is unstable and expanded on Huntington's disease chromosomes. *Mol Cell Probes* 1993; **7**: 235–39.
- 7 Losekoot M, van Belzen MJ, Seneca S, et al. EMQN/CMGS best practice guidelines for the molecular genetic testing of Huntington disease. *Eur J Hum Genet* 2013; **21**: 480–86.
- 8 Landwehrmeyer GB, Fitzer-Attas CJ, Giuliano JD, et al. Data analytics from Enroll-HD, a global clinical research platform for Huntington's disease. *Mov Disord Clin Pract* 2017; **4**: 212–24.
- 9 Langbehn DR, Brinkman RR, Falush D, Paulsen JS, Hayden MR, International Huntington's Disease Collaborative Group. A new model for prediction of the age of onset and penetrance for Huntington's disease based on CAG length. *Clin Genet* 2004; **65**: 267–77.
- 10 Ciosi M, Cumming SA, Alshammari AM, et al. Library preparation and MiSeq sequencing for the genotyping-by-sequencing of the Huntington disease *HTT* exon one trinucleotide repeat and the quantification of somatic mosaicism. *Protocol Exchange* 2018; DOI: **10.1038/protex.2018.089**.
- 11 Martin M. Cutadapt removes adapter sequences from high-throughput sequencing reads. *EMBnetjournal* 2011; **17**: 10–12.
- 12 Yu S, Fimmel A, Fung D, Trent RJ. Polymorphisms in the CAG repeat—a source of error in Huntington disease DNA testing. *Clin Genet* 2000; **58**: 469–72.
- 13 Milne I, Stephen G, Bayer M, et al. Using Tablet for visual exploration of second-generation sequencing data. *Brief Bioinform* 2013; **14**: 193–202.
- 14 Gomes-Pereira M, Bidichandani SI, Monckton DG. Analysis of unstable triplet repeats using small-pool polymerase chain reaction. *Methods Mol Biol* 2004; **277**: 61–76.
- 15 Bettencourt C, Hensman-Moss D, Flower M, et al. DNA repair pathways underlie a common genetic mechanism modulating onset in polyglutamine diseases. *Ann Neurol* 2016; **79**: 983–90.
- 16 The Genetic Modifiers of Huntington's Disease Consortium. Identification of genetic factors that modify clinical onset of Huntington's disease. *Cell* 2015; **162**: 516–26.
- 17 Lenth R. emmeans: estimated marginal means, aka least-squares means. R package. version 1.3.4, 2019. <https://cran.r-project.org/package=emmeans>
- 18 Therneau T. A package for survival analysis in S. R package version 2.38, 2015. <https://cran.r-project.org/package=survival>
- 19 Therneau TM, Grambsch PM. Modeling survival data: extending the Cox model. New York: Springer, 2000.
- 20 Kassambara A, Kosinski M. survminer: Drawing Survival Curves using 'ggplot2'. R package. version 0.4.3, 2018. <https://cran.r-project.org/package=survminer>
- 21 Cauty A, Ripley B. boot: bootstrap R (S-Plus) functions. R package. version 1.3-22, 2019. <https://cran.r-project.org/web/package=boot>
- 22 Davison AC, Hinkley DV. Bootstrap methods and their applications. Cambridge: Cambridge University Press, 1997.
- 23 Bates D, Machler M, Bolker BM, Walker SC. Fitting linear mixed-effects models using lme4. *J Stat Softw* 2015; **67**: 1–48.
- 24 Pecheux C, Mouret JF, Durr A, et al. Sequence analysis of the CCG polymorphic region adjacent to the CAG triplet repeat of the HD gene in normal and HD chromosomes. *J Med Genet* 1995; **32**: 399–400.
- 25 Goldberg YP, McMurray CT, Zeisler J, et al. Increased instability of intermediate alleles in families with sporadic Huntington disease compared to similar sized intermediate alleles in the general population. *Hum Mol Genet* 1995; **4**: 1911–18.
- 26 Gellera C, Meoni C, Castellotti B, et al. Errors in Huntington disease diagnostic test caused by trinucleotide deletion in the *IT15* gene. *Am J Hum Genet* 1996; **59**: 475–77.
- 27 Chong SS, Almqvist E, Telenius H, et al. Contribution of DNA sequence and CAG size to mutation frequencies of intermediate alleles for Huntington disease: evidence from single sperm analyses. *Hum Mol Genet* 1997; **6**: 301–09.
- 28 Margolis RL, Stine OC, Callahan C, et al. Two novel single-base-pair substitutions adjacent to the CAG repeat in the huntington disease gene (*IT15*): implications for diagnostic testing. *Am J Hum Genet* 1999; **64**: 323–26.



- 29 Kelly TE, Allinson P, McGlennen RC, Baker J, Bao Y. Expansion of a 27 CAG repeat allele into a symptomatic Huntington disease-producing allele. *Am J Med Genet* 1999; **87**: 91–92.
- 30 Williams LC, Hegde MR, Nagappan R, et al. Null alleles at the Huntington disease locus: implications for diagnostics and CAG repeat instability. *Genetic Testing* 2000; **4**: 55–60.
- 31 Norremolle A, Budtz-Jorgensen E, Fenger K, Nielsen JE, Sorensen SA, Hasholt L. 4p16.3 haplotype modifying age at onset of Huntington disease. *Clin Genet* 2009; **75**: 244–50.
- 32 Houge G, Bruland O, Bjornevoll I, Hayden MR, Semaka A. *De novo* Huntington disease caused by 26–44 CAG repeat expansion on a low-risk haplotype. *Neurology* 2013; **81**: 1099–100.
- 33 Becanovic K, Norremolle A, Neal SJ, et al. A SNP in the *HTT* promoter alters NF-kappaB binding and is a bidirectional genetic modifier of Huntington disease. *Nat Neurosci* 2015; **18**: 807–16.
- 34 Benjamini Y, Hochberg Y. Controlling the false discovery rate: a practical and powerful approach to multiple testing. *J R Stat Soc B* 1995; **57**: 289–300.
- 35 Tome S, Manley K, Simard JP, et al. MSH3 polymorphisms and protein levels affect CAG repeat instability in Huntington's disease mice. *PLoS Genet* 2013; **9**: e1003280.
- 36 van den Broek WJ, Nelen MR, Wansink DG, et al. Somatic expansion behaviour of the (CTG)<sub>(n)</sub> repeat in myotonic dystrophy knock-in mice is differentially affected by Msh3 and Msh6 mismatch-repair proteins. *Hum Mol Genet* 2002; **11**: 191–98.
- 37 Dragileva E, Hendricks A, Teed A, et al. Intergenerational and striatal CAG repeat instability in Huntington's disease knock-in mice involve different DNA repair genes. *Neurobiol Dis* 2009; **33**: 37–47.
- 38 Pinto RM, Dragileva E, Kirby A, et al. Mismatch repair genes *Mlh1* and *Mlh3* modify CAG instability in Huntington's disease mice: genome-wide and candidate approaches. *PLoS Genet* 2013; **9**: e1003930.

## V. Investigator lists

### V.1. TRACK-HD investigator list

| Name              | Institution                                                          |
|-------------------|----------------------------------------------------------------------|
| 't Hart, E.P.     | Leiden University Medical Centre, Leiden, Netherlands                |
| Acharya, T.       | University of Iowa, Iowa City, IA, USA                               |
| Andrews, S.C.     | Monash University, Victoria, Australia                               |
| Arran, N.         | St Mary's Hospital, Manchester, UK                                   |
| Axelson, E.       | University of Iowa, Iowa City, IA, USA                               |
| Bardinet, E.      | APHP, Hôpital Salpêtrière, Paris, France                             |
| Bechtel, N.       | University of Münster, Münster, Germany                              |
| Berna, C.         | University College London, London, UK                                |
| Bohlen, S.        | University of Münster, Münster, Germany                              |
| Borowsky, B.      | CHDI, USA                                                            |
| Callaghan, J.     | St Mary's Hospital, Manchester, UK                                   |
| Campbell, C.      | Indiana University, IN, USA / Monash University, Victoria, Australia |
| Campbell, M.      | Monash University, Victoria, Australia                               |
| Cash, D.M.        | IXICO, London, UK                                                    |
| Coleman, A.       | University of British Columbia, Vancouver, Canada                    |
| Craufurd, D.      | St Mary's Hospital, Manchester, UK                                   |
| Crawford, H.      | University College London, London, UK                                |
| Dar Santos, R.    | University of British Columbia, Vancouver, Canada                    |
| Decolongon, J.    | University of British Columbia, Vancouver, Canada                    |
| Dumas, E.M.       | Leiden University Medical Centre, Leiden, Netherlands                |
| Fox, N.C.         | University College London, London, UK                                |
| Frajman, E.       | Monash University, Victoria, Australia                               |
| Frost, C.         | London School of Hygiene and Tropical Medicine, London, UK           |
| Gibbard, C.       | University College London, London, UK                                |
| Hicks, S.         | University of Oxford, Oxford, UK                                     |
| Hobbs, N.Z.       | University College London, London, UK                                |
| Hoffman, A.       | Universtiy of Bochum, Bochum, Germany                                |
| Jauffret, C.      | APHP, Hôpital Salpêtrière, Paris, France                             |
| Johnson, H.       | University of Iowa, Iowa City, IA, USA                               |
| Jones, R.         | London School of Hygiene and Tropical Medicine, London, UK           |
| Jurgens, C.       | Leiden University Medical Centre, Leiden, Netherlands                |
| Justo, D.         | APHP, Hôpital Salpêtrière, Paris, France                             |
| Keenan, S.        | Imperial College London, London, UK                                  |
| Kennard, C.       | University of Oxford, Oxford, UK                                     |
| Kraus, P.         | Universtiy of Bochum, Bochum, Germany                                |
| Labuschagne, I.   | Monash University, Victoria, Australia                               |
| Lahiri, N.        | University College London, London, UK                                |
| Landwehrmeyer, B. | Ulm University, Ulm, Germany                                         |
| Lee, S.           | Massachusetts General Hospital, Harvard, MA, USA                     |
| Lehericy, S.      | APHP, Hôpital Salpêtrière, Paris, France                             |
| Malone, I.        | University College London, London, UK                                |
| Marelli, C.       | APHP, Hôpital Salpêtrière, Paris, France                             |
| Milchman, C.      | Monash University, Victoria, Australia                               |
| Monaco, W.        | Massachusetts General Hospital, Harvard, MA, USA                     |
| Nigaud, K.        | APHP, Hôpital Salpêtrière, Paris, France                             |
| Ordidge, R.       | University College London, London, UK                                |
| O'Regan, A.       | Monash University, Victoria, Australia                               |
| Owen, G.          | University College London, London, UK                                |

|                         |                                                       |
|-------------------------|-------------------------------------------------------|
| Patel, A.               | University College London, London, UK                 |
| Pepple, T.              | University College London, London, UK                 |
| Pourchot, P.            | APHP, Hôpital Salpêtrière, Paris, France              |
| Queller, S.             | Indiana University, IN, USA                           |
| Read, J.                | University College London, London, UK                 |
| Reilmann, R.            | University of Münster, Münster, Germany               |
| Rosas, H.D.             | Massachusetts General Hospital, Harvard, MA, USA      |
| Say, M.J.               | University College London, London, UK                 |
| Scahill, R.I.           | University College London, London, UK                 |
| Stopford, C.            | St Mary's Hospital, Manchester, UK                    |
| Stout, J.               | Monash University, Victoria, Australia                |
| Sturrock, A.            | University of British Columbia, Vancouver, Canada     |
| Tobin, A.               | CHDI, USA                                             |
| Valabrègue, R.          | APHP, Hôpital Salpêtrière, Paris, France              |
| van den Bogaard, S.J.A. | Leiden University Medical Centre, Leiden, Netherlands |
| van der Grond, J.       | Leiden University Medical Centre, Leiden, Netherlands |
| Wang, C.                | University of Iowa, Iowa City, IA, USA                |
| Whitehead, D.           | University College London, London, UK                 |
| Whitlock, K.            | Indiana University, IN, USA                           |
| Wild, E.                | University College London, London, UK                 |
| Witjes-Ane, M.N.        | Leiden University Medical Centre, Leiden, Netherlands |

## V.2. Enroll-HD investigator list

| Site                 | Country     | Name                      |
|----------------------|-------------|---------------------------|
| AarhusUnivHosp       | Denmark     | Anette Torvin Møller      |
| AarhusUnivHosp       | Denmark     | Louise Hasselstrøm Madsen |
| AucklandCityHosp     | New Zealand | Richard Roxburgh          |
| AucklandCityHosp     | New Zealand | Virginia Hogg             |
| AucklandCityHosp     | New Zealand | Richard Roxburgh          |
| AucklandCityHosp     | New Zealand | Virginia Hogg             |
| AugustaUniv          | USA         | John Morgan               |
| AugustaUniv          | USA         | Paula Jackson             |
| AvonWiltMenHeaPartTr | UK          | Lesley Gowers             |
| AvonWiltMenHeaPartTr | UK          | Carol Hall                |
| AyrshireHealthBoard  | UK          | Sharon Mulhern            |
| AyrshireHealthBoard  | UK          | Margo Henry               |
| AyrshireHealthBoard  | UK          | Tim Johnston              |
| AziendaOspedSanAndre | Italy       | Michela Ferraldeschi.     |
| AziendaOspedSanAndre | Italy       | Giovanni Ristori          |
| AziendaOspedSanAndre | Italy       | Silvia Romano             |
| BaylorCollMed        | USA         | Ami Patel                 |
| BaylorCollMed        | USA         | Christine Hunter          |
| BaylorCollMed        | USA         | Joseph Jankovic, MD       |
| BeaumontHosp         | Ireland     | Ms Fiona O'Donovan        |
| BeaumontHosp         | Ireland     | Prof Orla Hardiman        |
| BeaumontHosp         | Ireland     | Dr Sinead Maguire         |
| BeaumontHosp         | Ireland     | Dr Samira Bouazzaoui      |
| BeaumontHosp         | Ireland     | Niall Pender              |
| BirmSolNHSFounTrust  | UK          | Ellice Parkinson          |
| BirmSolNHSFounTrust  | UK          | Hugh Rickards             |

|                      |             |                         |
|----------------------|-------------|-------------------------|
| BostonMedCtr         | USA         | Raymond James           |
| BostonMedCtr         | USA         | Marie Saint-Hilaire     |
| BurgosFoun           | Spain       | Esther Cubo             |
| BurgosFoun           | Spain       | Natividad Marisccal     |
| CardiffUniv          | UK          | Anne Rosser             |
| CardiffUniv          | UK          | Rebecca Cousins         |
| CardiffUniv          | UK          | Thomas Massey           |
| CardiffUniv          | UK          | Duncan McLauchlan       |
| CardiffUniv          | UK          | Monica Busse            |
| CenterMovDis         | Canada      | Jonielyn Carlos         |
| CenterMovDis         | Canada      | Kimberly Thompson       |
| CenterMovDis         | Canada      | Mark Guttman            |
| CentHospUnivMontreal | Canada      | Lyne Jean               |
| CentHospUnivMontreal | Canada      | Sylvain Chouinard       |
| CentManHospFounTrust | UK          | Zara Skitt              |
| CentManHospFounTrust | UK          | Siofra Peeren           |
| CentManHospFounTrust | UK          | David Craufurd          |
| CentManHospFounTrust | UK          | Dawn Rogers             |
| CentManHospFounTrust | UK          | Iris Trender-Gerhard    |
| CentManHospFounTrust | UK          | Liz Howard              |
| CETRAM               | Chile       | Maria Consuelo Moos     |
| CETRAM               | Chile       | Pedro Chana             |
| ClevelandClinicFoun  | USA         | Anwar Ahmed             |
| ClinTriCtrMaastricht | Netherlands | Mayke Oosterloo         |
| ClinTriCtrMaastricht | Netherlands | Mirella Davies-Waber    |
| ColumbiaUniv         | USA         | Ronda Clouse            |
| ColumbiaUniv         | USA         | Massood Manoochehri     |
| ColumbiaUniv         | USA         | Sarah Janicki           |
| ColumbiaUniv         | USA         | Pietro Mazzoni          |
| ColumbiaUniv         | USA         | Elan Louis              |
| ColumbiaUniv         | USA         | Karen Marder            |
| ColumbiaUniv         | USA         | Paula Wasserman         |
| CooperHealth         | USA         | Amy Colcher             |
| CooperHealth         | USA         | Andrew March            |
| CopernicusPodLec     | Poland      | Agnieszka Konkel        |
| CopernicusPodLec     | Poland      | Witold Soltan           |
| CrucesHosp           | Spain       | Koldo Berganzo Corrales |
| CrucesHosp           | Spain       | Maria Angeles Acera Gil |
| DukeUniv             | USA         | Peggy Perry-Trice       |
| DukeUniv             | USA         | Burton Scott            |
| EmoryUniv            | USA         | Elaine Sperin           |
| EmoryUniv            | USA         | Jaime Hatcher-Martin    |
| EmoryUniv            | USA         | Stewart Factor          |
| FifeHealthBoard      | UK          | Gareth Thomas           |
| FifeHealthBoard      | UK          | Nicola Johns            |
| GeorgeHuntingtonInst | Germany     | Herwig Lange            |
| GeorgeHuntingtonInst | Germany     | Laura Dornhege          |
| GeorgeHuntingtonInst | Germany     | Paula Raulet            |
| GeorgeHuntingtonInst | Germany     | Ralf Reilmann           |
| GeorgeHuntingtonInst | Germany     | Stefan Bohlen           |
| GeorgetownUniv       | USA         | Karen Anderson          |
| GeorgetownUniv       | USA         | Natasha Scott           |

|                         |             |                           |
|-------------------------|-------------|---------------------------|
| GreatGlasgowHealthBoard | UK          | Catherine Deith           |
| GreatGlasgowHealthBoard | UK          | Dr. Stuart Ritchie        |
| GuyandStThomFounTrust   | UK          | Deborah Ruddy             |
| GuyandStThomFounTrust   | UK          | Dene Robertson            |
| GuyandStThomFounTrust   | UK          | Alison Lashwood           |
| GuyandStThomFounTrust   | UK          | Elizabeth White           |
| GuyandStThomFounTrust   | UK          | Thomasin Andrews          |
| HNDC                    | USA         | Gregory Suter             |
| HNDC                    | USA         | William M Mallonee        |
| HospCreuSantPau         | Spain       | Andrea Horta              |
| HospCreuSantPau         | Spain       | Jaime Kulisevsky          |
| HospInfantChrisBadaj    | Spain       | Carmen Durán Herrera      |
| HospInfantChrisBadaj    | Spain       | Patrocinio García Moreno  |
| HospMareMerce           | Spain       | Elvira Roca Goma          |
| HospMareMerce           | Spain       | Jesús Miguel Ruíz Idiago  |
| HospUnivBellvitge       | Spain       | Matilde Calopa            |
| HospUnivBellvitge       | Spain       | Jordi Bas                 |
| InstNeuroBuenoAires     | Argentina   | Emilia Gatto              |
| InstPsychandNeuro       | Poland      | Grzegorz Witkowski        |
| InstPsychandNeuro       | Poland      | Iwona Stepniak            |
| JimenDiazFoun           | Spain       | Pedro J Garcia Ruiz       |
| JimenDiazFoun           | Spain       | Asunción Martinez         |
| JohnsHopkinsUniv        | USA         | Frederick C. Nucifora Jr. |
| JohnsHopkinsUniv        | USA         | Christopher Ross          |
| JohnsHopkinsUniv        | USA         | Mollie Jenckes            |
| KbolsarAmpKlinTauf      | Germany     | Alzbeta Mühlbäck          |
| KbolsarAmpKlinTauf      | Germany     | Matthias Dose             |
| KbolsarAmpKlinTauf      | Germany     | Michael Bachmaier         |
| KbolsarAmpKlinTauf      | Germany     | Ralf Marquard             |
| KrakowskaAkademiaNeuro  | Poland      | Monica Rudzinska          |
| KrakowskaAkademiaNeuro  | Poland      | Natalia Grabska           |
| LeedsTeachHospTrust     | UK          | Alison Kraus              |
| LeedsTeachHospTrust     | UK          | Stuart Jamieson           |
| LeedsTeachHospTrust     | UK          | Ivana Markova             |
| LeedsTeachHospTrust     | UK          | Emma Hobson               |
| LeedsTeachHospTrust     | UK          | Callum Schofield          |
| LegItalRiceHunt         | Italy       | Massimo Marano            |
| LegItalRiceHunt         | Italy       | Simone Migliore           |
| LegItalRiceHunt         | Italy       | Sabrina Maffi             |
| LegItalRiceHunt         | Italy       | Barbara D'Alessio         |
| LegItalRiceHunt         | Italy       | Ferdinando Squitieri      |
| Leicestershire          | UK          | Dawn Freire-Patino        |
| Leicestershire          | UK          | Caroline Hallam           |
| Leicestershire          | UK          | Reza Kiani                |
| LeidenUniv              | Netherlands | Raymund Roos              |
| LeidenUniv              | Netherlands | Marye Hogenboom           |
| LomaLindaUniv           | USA         | Dharmaseeli Moses         |
| LothianHealthBoard      | UK          | Philip Greene             |
| LothianHealthBoard      | UK          | Marie McGill              |
| LothianHealthBoard      | UK          | Mary Porteous             |
| MilanGenetic            | Italy       | Anna Castaldo             |
| MilanGenetic            | Italy       | Caterina Mariotti         |

|                       |           |                               |
|-----------------------|-----------|-------------------------------|
| MilanGenetic          | Italy     | Lorenzo Nanetti               |
| MilanNeuro            | Italy     | Dominga Paridi                |
| MilanNeuro            | Italy     | Paola Soliveri                |
| MilanNeuro            | Italy     | Simona Castagliuolo           |
| MinnMedResFoun        | USA       | Dawn Radtke                   |
| MinnMedResFoun        | USA       | Martha Nance                  |
| MonashUniv            | Australia | Dr. Andrew Churchyard         |
| MonashUniv            | Australia | Katie Fitzgerald              |
| MonashUniv            | Australia | Julie Stout                   |
| NHSForthValley        | UK        | Christian Neumann             |
| NHSForthValley        | UK        | David Thomson                 |
| NorStaffCombHeaTrust  | UK        | George El-Nimr                |
| NorStaffCombHeaTrust  | UK        | Karen Kennedy                 |
| NorthBristolTrust     | UK        | Dr Catherine Pennington       |
| NorthBristolTrust     | UK        | Serena Dillon                 |
| NorthBristolTrust     | UK        | Elizabeth Coulthard           |
| NorthBristolTrust     | UK        | Louise Gethin                 |
| NorthMetroHlthServ    | Australia | Jacenta Abbott                |
| NorthMetroHlthServ    | Australia | Peter Panegyres               |
| NorthumbTyneFreeman   | UK        | Jill Davison                  |
| NorthumbTyneFreeman   | UK        | Suresh Komati                 |
| NorthumbTyneFreeman   | UK        | Sarah Edwards                 |
| OhioStateUniv         | USA       | Allison Daley                 |
| OhioStateUniv         | USA       | Sandra Kostyk                 |
| OhioStateUniv         | USA       | Katherine Ambrogi             |
| OxfordUnivHospTrust   | UK        | Professor Andrea H Nemeth     |
| OxfordUnivHospTrust   | UK        | Sarsha Wilson                 |
| PlyHospNHSTrust       | UK        | Julie Frost                   |
| PlyHospNHSTrust       | UK        | Dr. Rupert Noad               |
| PlyHospNHSTrust       | UK        | Leanne Timings                |
| PooleHospFounTrust    | UK        | Annemieke Fox                 |
| PooleHospFounTrust    | UK        | John Burn                     |
| PoznanUniv            | Poland    | Daniel Zielonka               |
| PoznanUniv            | Poland    | Elżbieta Alicja Puch          |
| RamonCajalUnivHosp    | Spain     | José Luis López-Sendón Moreno |
| RamonCajalUnivHosp    | Spain     | Verónica Mañanes Barral       |
| RockyMtnMovDis        | USA       | Jessica Jaynes                |
| RockyMtnMovDis        | USA       | Rajeev Kumar                  |
| RoyalDevExetFounTrst  | UK        | Sarah Irvine                  |
| RoyalDevExetFounTrst  | UK        | Timothy Harrower              |
| RoyBerkNHSFounTrust   | UK        | Anita Foster                  |
| RoyBerkNHSFounTrust   | UK        | Dr. Richard Armstrong         |
| RushUniv              | USA       | Courtney Timms                |
| RushUniv              | USA       | Jennifer Goldman              |
| RutgersUniv           | USA       | Daniel Schneider              |
| RutgersUniv           | USA       | Deborah Caputo                |
| SanfordResearch       | USA       | Tish Skarloken                |
| SanfordResearch       | USA       | Tanya Harlow                  |
| SanfordResearch       | USA       | Destini Spaeth                |
| SchleswigHolsteinHosp | Germany   | Sandra Bloess                 |
| SchleswigHolsteinHosp | Germany   | Alexander Münchau             |
| SchleswigHolsteinHosp | Germany   | Jenny Schmalfeld              |



|                          |         |                              |
|--------------------------|---------|------------------------------|
| SchleswigHolsteinHosp    | Germany | Klaus Gehring                |
| SchleswigHolsteinHosp    | Germany | Vera Tadic                   |
| SheffieldChildFouTru     | UK      | Anya Kholkina                |
| SheffieldChildFouTru     | UK      | Oliver Quarrell              |
| SilesianMedUnivKatowice  | Poland  | Klaudia Plinta               |
| SonEspasesHosp           | Spain   | Penélope Navas Arques        |
| SonEspasesHosp           | Spain   | Ines Legarda                 |
| SouthamptonUnivHospTrust | UK      | Christopher Kipps            |
| SouthamptonUnivHospTrust | UK      | Veena Agarwal                |
| StAndrewsHealth          | UK      | Elvina Chu                   |
| StGeorgeHealthTrust      | UK      | Nayana Lahiri                |
| StGeorgeHealthTrust      | UK      | Uruj Anjum                   |
| StJosefAndElisabethHosp  | Germany | Barbara Kaminski             |
| StJosefAndElisabethHosp  | Germany | Carsten Saft                 |
| StJosefAndElisabethHosp  | Germany | Rainer Hoffmann              |
| StJosefAndElisabethHosp  | Germany | Sarah von Hein               |
| Tayside                  | UK      | Alison Tonner                |
| Tayside                  | UK      | Lindsay Wilson               |
| Tayside                  | UK      | David Goudie                 |
| Tayside                  | UK      | Paula McFadyen               |
| TechUnivMunich           | Germany | Adolf Weindl                 |
| TechUnivMunich           | Germany | Antje Lüsebrink              |
| UnivAberdeen             | UK      | Daniela Rae                  |
| UnivAberdeen             | UK      | Alisdair Ross                |
| UnivAberdeen             | UK      | Stella Sihlabela             |
| UnivAberdeen             | UK      | Zosia Miedzybrodzka          |
| UnivAlbertaGlenrose      | Canada  | Pam King                     |
| UnivAlbertaGlenrose      | Canada  | Wayne Martin                 |
| UnivBari                 | Italy   | Marina de Tommaso            |
| UnivBari                 | Italy   | Vittorio Scirucchio          |
| UnivBologna              | Italy   | Cesa Scaglione               |
| UnivBologna              | Italy   | Pietro Cortelli              |
| UnivBritishCol           | Canada  | Allison Coleman              |
| UnivBritishCol           | Canada  | Lynn Raymond                 |
| UnivBritishCol           | Canada  | Blair Leavitt                |
| UnivCalDavis             | USA     | Alexandra (Sasha) Duffy      |
| UnivCalDavis             | USA     | Amanda Martin                |
| UnivCalDavis             | USA     | Ashok Joshua Dayananthan     |
| UnivCalDavis             | USA     | Vicki Wheelock               |
| UnivCalgary              | Canada  | Lorelei Tainsh (Derwent)     |
| UnivCalgary              | Canada  | Sarah Furtado                |
| UnivCallrvine            | USA     | Nicolas Phielipp             |
| UnivCallrvine            | USA     | Durk Thompson                |
| UnivCallrvine            | USA     | Breana Chew                  |
| UnivCalSanDiego          | USA     | Jody Corey-Bloom             |
| UnivCalSanDiego          | USA     | Sungmee Park                 |
| UnivCalSanDiego          | USA     | Ajay Nathan                  |
| UnivCalSanFran           | USA     | Alexandra Nelson             |
| UnivCambridge            | UK      | Dr Sarah Mason               |
| UnivCambridge            | UK      | Dr Caroline Williams-Gray    |
| UnivCambridge            | UK      | Anna Gerritz (nee Di Pietro) |
| UnivCambridge            | UK      | Roger Barker                 |

|                         |             |                           |
|-------------------------|-------------|---------------------------|
| UnivCattolicaSacriCur   | Italy       | Flavia Torlizzi           |
| UnivCattolicaSacriCur   | Italy       | Anna Rita Bentivoglio     |
| UnivCattolicaSacriCur   | Italy       | Marcella Solito           |
| UnivCharite             | Germany     | Josef Priller             |
| UnivCharite             | Germany     | Anika Langenfurth         |
| UnivCharite             | Germany     | Markus Beuth              |
| UnivChicago             | USA         | Joan Young                |
| UnivChicago             | USA         | Tao Xie                   |
| UnivCincinnatiPhysCo    | USA         | Andrew Duker              |
| UnivCincinnatiPhysCo    | USA         | Katie Krier               |
| UnivCollLondon          | UK          | Ed Wild                   |
| UnivCollLondon          | UK          | Monica Lewis              |
| UnivCollLondon          | UK          | Nicola Robertson          |
| UnivCollLondon          | UK          | Sarah Tabrizi             |
| UnivConnHealthCtr       | USA         | Bonnie Hennig             |
| UnivConnHealthCtr       | USA         | Kevin James Manning       |
| UniverMedCtrFreiburg    | Germany     | Gerit Kammel              |
| UniverMedCtrFreiburg    | Germany     | Stephan Klebe             |
| UniverMedCtrFreiburg    | Germany     | Michel Rijntjes           |
| UnivGroningen           | Netherlands | H.P.H. Kremer             |
| UnivGroningen           | Netherlands | Jesper Klooster           |
| UnivHospAachen          | Germany     | Beate Schumann            |
| UnivHospAachen          | Germany     | Johannes Schiefer         |
| UnivHospAachen          | Germany     | Kathrin Reetz             |
| UnivHospCopenhagen      | Denmark     | Christina Vangsted Hansen |
| UnivHospCopenhagen      | Denmark     | Jørgen Nielsen            |
| UnivHospCopenhagen      | Denmark     | Lena E. Hjerminde         |
| UnivHospCopenhagen      | Denmark     | Suzanne Granhøj Lindquist |
| UnivHospCopenhagen      | Denmark     | Peter Roos                |
| UnivHospErlangen        | Germany     | Susanne Seifert           |
| UnivHospErlangen        | Germany     | Christina Kozay           |
| UnivHospErlangen        | Germany     | Zacharias Kohl            |
| UnivHospGiessenMarburg  | Germany     | Katrin Bürk               |
| UnivHospOdense          | Denmark     | Lene Wermuth              |
| UnivHospOdense          | Denmark     | Marianne Dybro Lundsgaard |
| UnivHospUlm             | Germany     | Hela Jerbi                |
| UnivHospUlm             | Germany     | Jan Lewerenz              |
| UnivHospUlm             | Germany     | Michael Orth              |
| UnivHospUlm             | Germany     | Panteha Fathinia          |
| UnivHospUlm             | Germany     | Patrick Weydt             |
| UnivHospWuerzburg       | Germany     | Kerstin Nöth              |
| UnivHospWuerzburg       | Germany     | Christine Leypold         |
| UnivHospWuerzburg       | Germany     | Kai Boelmans              |
| UnivIllinois            | USA         | Mitch King                |
| UnivIllinois            | USA         | Sadie Foster              |
| UnivIowa                | USA         | Angel L. Dominguez        |
| UnivIowa                | USA         | Jane S Paulsen            |
| UnivKansasMedCtrResInst | USA         | Carolyn Gray              |
| UnivKansasMedCtrResInst | USA         | Richard Dubinsky          |
| UnivMaryland            | USA         | Terra Hill                |
| UnivMaryland            | USA         | William Keller            |
| UnivMich                | USA         | Elizabeth Sullivan        |

|                      |             |                        |
|----------------------|-------------|------------------------|
| UnivNaples           | Italy       | Luigi di Maio          |
| UnivNaples           | Italy       | Cinzia Valeria Russo   |
| UnivNaples           | Italy       | Silvio Peluso          |
| UnivNaples           | Italy       | Elena Salvatore        |
| UnivNaples           | Italy       | Giuseppe De Michele    |
| UnivOtago            | New Zealand | Laura Paermentier      |
| UnivOtago            | New Zealand | Tim Anderson           |
| UnivOtago            | New Zealand | Laura Paermentier      |
| UnivOtago            | New Zealand | Tim Anderson           |
| UnivPitt             | USA         | Larry Ivanco           |
| UnivPitt             | USA         | Valerie Suski          |
| UnivRochester        | USA         | Amy Chesire            |
| UnivRochester        | USA         | Frederick Marshall     |
| UnivRochester        | USA         | Julia Iourinets        |
| UnivSouthFlorida     | USA         | Danielle Hergert       |
| UnivSouthFlorida     | USA         | Patricia Johnson       |
| UnivSouthFlorida     | USA         | Emily Kellogg          |
| UnivSouthFlorida     | USA         | Juan Sanchez-Ramos     |
| UnivSouthFlorida     | USA         | Kelly (Kollen) Elliott |
| UnivTenn             | USA         | Dr. Mark LeDoux        |
| UnivTenn             | USA         | Amanda Nolte           |
| UnivTexasHlthCtrHous | USA         | Erin Furr Stimming     |
| UnivTexasHlthCtrHous | USA         | Leigh Beth Latham      |
| UnivUtah             | USA         | Meghan Zorn            |
| UnivUtah             | USA         | Matthew Halverson      |
| UnivUtah             | USA         | Stefan Pulst           |
| UnivUtah             | USA         | Paola Wall             |
| UnivVermont          | USA         | Emily Houston          |
| UnivVermont          | USA         | James Boyd             |
| UnivVirginia         | USA         | Katie L. Sullivan      |
| UnivVirginia         | USA         | Susan Dietrich         |
| UnivWarsaw           | Poland      | Piotr Janik            |
| UnivWarsaw           | Poland      | Zygmunt Jamrozik       |
| UnivWash             | USA         | Ali Samii              |
| UnivWash             | USA         | Debra Del Castillo     |
| VanderbiltUniv       | USA         | Daniel O. Claassen     |
| VanderbiltUniv       | USA         | Lauren West            |
| VanderbiltUniv       | USA         | Onyebuchi Okeke        |
| VirginiaCommUniv     | USA         | Claudia Testa          |
| VirginiaCommUniv     | USA         | Ginger Norris          |
| WakeForestUniv       | USA         | Christine O'Neill      |
| WakeForestUniv       | USA         | Francis Walker         |
| WaltonCtrFounTrust   | UK          | Louise Pate            |
| WaltonCtrFounTrust   | UK          | Rhys Davies            |
| WashingtonUniv       | USA         | Joel S. Perlmutter     |
| WashingtonUniv       | USA         | Stacey Barton          |
| WashingtonUniv       | USA         | Elaine Most            |
| WestSydneyHlthDist   | Australia   | Dr. Clement Loy        |
| WestSydneyHlthDist   | Australia   | Jillian McMillan       |
| WestSydneyHlthDist   | Australia   | Therese Alting         |
